# Supplementary material for: Nonlinear optical properties of diaromatic stilbene, butadiene and thiophene derivatives
Source: Royal Society of Chemistry journal article supplement (doi:10.1039/d1nj00456e), 2021-01-01
Supplement: d1nj00456e1.pdf [file d1nj00456e1.pdf]

**Electronic Supplementary Information (ESI):**

**Nonlinear Optical Properties of Diaromatic Stilbene, Butadiene and Thiophene Derivatives**

Esa Kukkonen,<sup>†</sup> Elmeri Lahtinen,<sup>†</sup> Pasi Myllyperkiö,<sup>‡</sup> Matti Haukka,<sup>†</sup> and Jari Konu <sup>\*,†</sup>

<sup>†</sup> Department of Chemistry and <sup>‡</sup> Nanoscience Center, University of Jyväskylä, P.O. Box 35, FI-40014 Jyväskylä, Finland.

|                                                                                                                                     |       |
|-------------------------------------------------------------------------------------------------------------------------------------|-------|
| <b>Table S1.</b> Crystallographic data for compounds <b>1a</b> -centro, <b>1a</b> -non-centro, <b>1b</b> , and <b>1c</b> .....      | 2     |
| <b>Table S2.</b> Crystallographic data for compounds <b>1d</b> , <b>1e</b> , <b>4</b> ·Pcell, and <b>4</b> ·Ccell.....              | 3     |
| <b>Table S3.</b> Crystallographic data for compounds <b>2a</b> , <b>3a</b> -mono, <b>3a</b> -ortho, <b>3b</b> , and <b>3c</b> ..... | 4     |
| <b>Tables S4-S16.</b> Bond parameters for compounds <b>1-4</b> .....                                                                | 5-19  |
| <b>Figures S1-S11.</b> <sup>1</sup> H NMR spectra of compounds <b>1-3</b> .....                                                     | 20-24 |
| <b>Figures S12-S22.</b> IR spectra of compounds <b>1-3</b> .....                                                                    | 25-30 |

**Table S1.** Crystallographic data for compounds **1a**-centro,<sup>a</sup> **1a**-non-centro,<sup>a</sup> **1b**,<sup>a</sup> and **1c**<sup>a</sup>.

|                                                            | <b>1a</b> -centro                                 | <b>1a</b> -non-centro                             | <b>1b</b>                                                      | <b>1c</b>                                       |
|------------------------------------------------------------|---------------------------------------------------|---------------------------------------------------|----------------------------------------------------------------|-------------------------------------------------|
| emp. formula                                               | C <sub>16</sub> H <sub>14</sub> ClNO <sub>4</sub> | C <sub>16</sub> H <sub>14</sub> ClNO <sub>4</sub> | C <sub>14</sub> H <sub>9</sub> BrN <sub>2</sub> O <sub>5</sub> | C <sub>15</sub> H <sub>13</sub> NO <sub>3</sub> |
| Fw                                                         | 319.73                                            | 319.73                                            | 365.14                                                         | 255.26                                          |
| cryst. system                                              | Monoclinic                                        | Monoclinic                                        | Monoclinic                                                     | Triclinic                                       |
| space group                                                | P2 <sub>1</sub> /c                                | P2 <sub>1</sub>                                   | Cc                                                             | P-1                                             |
| <i>a</i> , Å                                               | 7.9071(2)                                         | 4.2178(2)                                         | 3.2836(1)                                                      | 11.6720(2)                                      |
| <i>b</i> , Å                                               | 28.2960(6)                                        | 16.5839(6)                                        | 26.8722(5)                                                     | 11.8172(2)                                      |
| <i>c</i> , Å                                               | 7.1173(2)                                         | 10.2700(4)                                        | 13.2409(2)                                                     | 14.7910(2)                                      |
| $\alpha$ , deg.                                            | 90                                                | 90                                                | 90                                                             | 109.528(1)                                      |
| $\beta$ , deg.                                             | 115.383(4)                                        | 93.821(4)                                         | 93.319(2)                                                      | 103.389(1)                                      |
| $\gamma$ , deg.                                            | 90                                                | 90                                                | 90                                                             | 90.949(1)                                       |
| <i>V</i> , Å <sup>3</sup>                                  | 1438.69(8)                                        | 716.76(5)                                         | 1358.20(5)                                                     | 1860.67(5)                                      |
| <i>Z</i>                                                   | 4                                                 | 2                                                 | 4                                                              | 6                                               |
| <i>T</i> , °C                                              | -150                                              | -150                                              | -150                                                           | -150                                            |
| $\rho_{\text{calcd}}$ , g/cm <sup>3</sup>                  | 1.476                                             | 1.481                                             | 1.786                                                          | 1.367                                           |
| $\mu$ , mm <sup>-1</sup>                                   | 2.524                                             | 2.533                                             | 4.397                                                          | 0.787                                           |
| cryst. size, mm <sup>3</sup>                               | 0.31×0.15×0.10                                    | 0.39×0.07×0.07                                    | 0.61×0.07×0.02                                                 | 0.25×0.21×0.16                                  |
| <i>F</i> (000)                                             | 664                                               | 332                                               | 728                                                            | 804                                             |
| $\Theta$ range, deg                                        | 6.20-76.83                                        | 4.32-76.87                                        | 3.29-76.74                                                     | 3.28-76.98                                      |
| reflns collected                                           | 5734                                              | 2847                                              | 5023                                                           | 72195                                           |
| unique reflns                                              | 2655                                              | 1977                                              | 1997                                                           | 7134                                            |
| <i>R</i> <sub>int</sub>                                    | 0.0235                                            | 0.0321                                            | 0.0220                                                         | 0.0297                                          |
| reflns [ <i>I</i> >2 $\sigma$ ( <i>I</i> )]                | 2946                                              | 2072                                              | 2021                                                           | 7769                                            |
| <i>R</i> <sub>1</sub> [ <i>I</i> >2 $\sigma$ ( <i>I</i> )] | 0.0345                                            | 0.0391                                            | 0.0296                                                         | 0.0390                                          |
| <i>wR</i> <sub>2</sub> (all data)                          | 0.0940                                            | 0.1061                                            | 0.0826                                                         | 0.1103                                          |
| GOF on <i>F</i> <sup>2</sup>                               | 1.050                                             | 1.077                                             | 1.050                                                          | 1.059                                           |
| completeness                                               | 0.997                                             | 0.997                                             | 0.998                                                          | 0.999                                           |

<sup>a</sup>  $\lambda$  (CuK $\alpha$ ) = 1.54184 Å.

**Table S2.** Crystallographic data for compounds **1d**,<sup>a</sup> **1e**,<sup>b</sup> **4·Pcell**,<sup>b</sup> and **4·Ccell**.<sup>b</sup>

|                                                            | <b>1d</b>                                       | <b>1e</b>                                                     | <b>4·Pcell</b>                                                                | <b>4·Ccell</b>                                                                |
|------------------------------------------------------------|-------------------------------------------------|---------------------------------------------------------------|-------------------------------------------------------------------------------|-------------------------------------------------------------------------------|
| emp. formula                                               | C <sub>16</sub> H <sub>15</sub> NO <sub>4</sub> | C <sub>16</sub> H <sub>16</sub> N <sub>2</sub> O <sub>2</sub> | C <sub>32</sub> H <sub>28</sub> Cl <sub>2</sub> N <sub>2</sub> O <sub>8</sub> | C <sub>32</sub> H <sub>28</sub> Cl <sub>2</sub> N <sub>2</sub> O <sub>8</sub> |
| Fw                                                         | 285.29                                          | 268.31                                                        | 639.46                                                                        | 639.46                                                                        |
| cryst. system                                              | Monoclinic                                      | Monoclinic                                                    | Monoclinic                                                                    | Monoclinic                                                                    |
| space group                                                | P2 <sub>1</sub> /c                              | P2 <sub>1</sub>                                               | P2 <sub>1</sub> /n                                                            | C2/c                                                                          |
| <i>a</i> , Å                                               | 13.242(2)                                       | 5.9378(4)                                                     | 11.5166(2)                                                                    | 14.6720(3)                                                                    |
| <i>b</i> , Å                                               | 7.6505(7)                                       | 7.3721(7)                                                     | 12.8669(2)                                                                    | 10.3954(2)                                                                    |
| <i>c</i> , Å                                               | 14.519(1)                                       | 15.357(1)                                                     | 19.7897(3)                                                                    | 18.9716(3)                                                                    |
| $\alpha$ , deg.                                            | 90                                              | 90                                                            | 90                                                                            | 90                                                                            |
| $\beta$ , deg.                                             | 111.61(1)                                       | 96.42(1)                                                      | 90.467(2)                                                                     | 93.264(2)                                                                     |
| $\gamma$ , deg.                                            | 90                                              | 90                                                            | 90                                                                            | 90                                                                            |
| <i>V</i> , Å <sup>3</sup>                                  | 1367.4(3)                                       | 668.02(9)                                                     | 2932.40(9)                                                                    | 2888.88(9)                                                                    |
| <i>Z</i>                                                   | 4                                               | 2                                                             | 4                                                                             | 4                                                                             |
| <i>T</i> , °C                                              | -150                                            | -150                                                          | -150                                                                          | -150                                                                          |
| $\rho_{\text{calcd}}$ , g/cm <sup>3</sup>                  | 1.386                                           | 1.334                                                         | 1.448                                                                         | 1.470                                                                         |
| $\mu$ , mm <sup>-1</sup>                                   | 0.100                                           | 0.719                                                         | 2.476                                                                         | 2.514                                                                         |
| cryst. size, mm <sup>3</sup>                               | 0.26×0.15×0.10                                  | 0.13×0.05×0.03                                                | 0.25×0.10×0.05                                                                | 0.11×0.07×0.02                                                                |
| <i>F</i> (000)                                             | 600                                             | 284                                                           | 1328                                                                          | 1328                                                                          |
| $\Theta$ range, deg                                        | 2.86-29.21                                      | 2.83-76.76                                                    | 4.10-76.51                                                                    | 4.67-76.76                                                                    |
| reflns collected                                           | 5843                                            | 3947                                                          | 12694                                                                         | 4692                                                                          |
| unique reflns                                              | 1633                                            | 1671                                                          | 5148                                                                          | 2707                                                                          |
| <i>R</i> <sub>int</sub>                                    | 0.0564                                          | 0.0322                                                        | 0.0288                                                                        | 0.0139                                                                        |
| reflns [ <i>I</i> >2 $\sigma$ ( <i>I</i> )]                | 3149                                            | 2194                                                          | 6015                                                                          | 2910                                                                          |
| <i>R</i> <sub>1</sub> [ <i>I</i> >2 $\sigma$ ( <i>I</i> )] | 0.0802                                          | 0.0855                                                        | 0.0356                                                                        | 0.0355                                                                        |
| <i>wR</i> <sub>2</sub> (all data)                          | 0.2551                                          | 0.2602                                                        | 0.0958                                                                        | 0.0981                                                                        |
| GOF on <i>F</i> <sup>2</sup>                               | 1.030                                           | 1.101                                                         | 1.021                                                                         | 1.052                                                                         |
| completeness                                               | 0.994                                           | 0.997                                                         | 0.999                                                                         | 0.993                                                                         |

<sup>a</sup>  $\lambda$  (MoK $\alpha$ ) = 0.71073 Å. <sup>b</sup>  $\lambda$  (CuK $\alpha$ ) = 1.54184 Å.

**Table S3.** Crystallographic data for **2a**,<sup>a</sup> **3a**-mono,<sup>a</sup> **3a**-ortho,<sup>a</sup> **3b**,<sup>b</sup> and **3c**<sup>a</sup>.

|                                                            | <b>2a</b>                                        | <b>3a</b> -mono                                    | <b>3a</b> -ortho                                   | <b>3b</b>                                         | <b>3c</b>                                                      |
|------------------------------------------------------------|--------------------------------------------------|----------------------------------------------------|----------------------------------------------------|---------------------------------------------------|----------------------------------------------------------------|
| emp. formula                                               | C <sub>16</sub> H <sub>12</sub> FNO <sub>2</sub> | C <sub>12</sub> H <sub>8</sub> BrNO <sub>2</sub> S | C <sub>12</sub> H <sub>8</sub> BrNO <sub>2</sub> S | C <sub>13</sub> H <sub>11</sub> NO <sub>2</sub> S | C <sub>13</sub> H <sub>11</sub> NO <sub>2</sub> S <sub>2</sub> |
| Fw                                                         | 269.27                                           | 310.16                                             | 310.16                                             | 245.29                                            | 277.35                                                         |
| cryst. system                                              | monoclinic                                       | Monoclinic                                         | Orthorhombic                                       | Monoclinic                                        | Monoclinic                                                     |
| space group                                                | Pc                                               | P2 <sub>1</sub> /c                                 | Pbca                                               | P2 <sub>1</sub> /n                                | P2 <sub>1</sub> /n                                             |
| <i>a</i> , Å                                               | 7.1272(2)                                        | 10.1458(5)                                         | 7.579(2)                                           | 11.2659(2)                                        | 7.903(2)                                                       |
| <i>b</i> , Å                                               | 12.8757(4)                                       | 15.8649(6)                                         | 11.453(2)                                          | 7.5074(1)                                         | 7.321(2)                                                       |
| <i>c</i> , Å                                               | 7.3763(3)                                        | 14.8141(7)                                         | 27.652(6)                                          | 27.4441(4)                                        | 22.042(4)                                                      |
| $\alpha$ , deg.                                            | 90                                               | 90                                                 | 90                                                 | 90                                                | 90                                                             |
| $\beta$ , deg.                                             | 104.703(4)                                       | 102.260(5)                                         | 90                                                 | 92.743(2)                                         | 90.25(3)                                                       |
| $\gamma$ , deg.                                            | 90                                               | 90                                                 | 90                                                 | 90                                                | 90                                                             |
| <i>V</i> , Å <sup>3</sup>                                  | 654.74(4)                                        | 2330.1(2)                                          | 2400.4(8)                                          | 2318.50(6)                                        | 1275.3(4)                                                      |
| <i>Z</i>                                                   | 2                                                | 8                                                  | 8                                                  | 8                                                 | 4                                                              |
| <i>T</i> , °C                                              | -150                                             | -150                                               | -120                                               | -150                                              | -120                                                           |
| $\rho_{\text{calcd}}$ , g/cm <sup>3</sup>                  | 1.366                                            | 1.768                                              | 1.717                                              | 1.405                                             | 1.445                                                          |
| $\mu$ , mm <sup>-1</sup>                                   | 0.832                                            | 3.694                                              | 3.586                                              | 2.390                                             | 0.409                                                          |
| cryst. size, mm <sup>3</sup>                               | 0.53×0.22×0.13                                   | 0.28×0.19×0.16                                     | 0.20×0.10×0.04                                     | 0.20×0.10×0.06                                    | 0.50×0.30×0.04                                                 |
| <i>F</i> (000)                                             | 280                                              | 1232                                               | 1232                                               | 1024                                              | 576                                                            |
| $\Theta$ range, deg                                        | 3.43-85.30                                       | 2.40-28.36                                         | 2.95-25.02                                         | 3.22-76.83                                        | 2.73-27.47                                                     |
| reflns collected                                           | 4854                                             | 10991                                              | 8985                                               | 9641                                              | 10689                                                          |
| unique reflns                                              | 1777                                             | 3951                                               | 2112                                               | 4115                                              | 2189                                                           |
| <i>R</i> <sub>int</sub>                                    | 0.0182                                           | 0.0342                                             | 0.0944                                             | 0.0230                                            | 0.0388                                                         |
| reflns [ <i>I</i> >2 $\sigma$ ( <i>I</i> )]                | 1881                                             | 5067                                               | 1734                                               | 4756                                              | 2912                                                           |
| <i>R</i> <sub>1</sub> [ <i>I</i> >2 $\sigma$ ( <i>I</i> )] | 0.0334                                           | 0.0375                                             | 0.0945                                             | 0.0338                                            | 0.0497                                                         |
| <i>wR</i> <sub>2</sub> (all data)                          | 0.0962                                           | 0.0823                                             | 0.1737                                             | 0.0929                                            | 0.1117                                                         |
| GOF on <i>F</i> <sup>2</sup>                               | 1.063                                            | 1.024                                              | 1.266                                              | 1.045                                             | 1.126                                                          |
| completeness                                               | 0.994                                            | 0.999                                              | 0.997                                              | 0.995                                             | 0.998                                                          |

<sup>a</sup>  $\lambda$  (MoK $\alpha$ ) = 0.71073 Å. <sup>b</sup>  $\lambda$  (CuK $\alpha$ ) = 1.54184 Å.

**Table S4.** Bond lengths and angles in compound **1a**-centro (H atoms removed for clarity).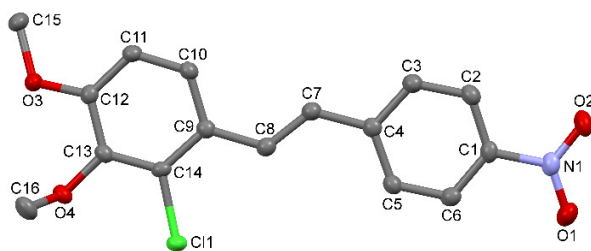

| Atom | Atom | Length/Å   | Atom | Atom | Length/Å   |
|------|------|------------|------|------|------------|
| Cl1  | C14  | 1.7395(14) | C4   | C5   | 1.401(2)   |
| O1   | N1   | 1.2268(18) | C4   | C7   | 1.463(2)   |
| O2   | N1   | 1.2288(18) | C5   | C6   | 1.386(2)   |
| O3   | C12  | 1.3528(17) | C7   | C8   | 1.333(2)   |
| O3   | C15  | 1.4389(18) | C8   | C9   | 1.4633(19) |
| O4   | C13  | 1.3717(16) | C9   | C10  | 1.403(2)   |
| O4   | C16  | 1.4381(19) | C9   | C14  | 1.4067(19) |
| N1   | C1   | 1.4656(18) | C10  | C11  | 1.385(2)   |
| C1   | C2   | 1.384(2)   | C11  | C12  | 1.396(2)   |
| C1   | C6   | 1.386(2)   | C12  | C13  | 1.406(2)   |
| C2   | C3   | 1.383(2)   | C13  | C14  | 1.387(2)   |
| C3   | C4   | 1.403(2)   |      |      |            |

| Atom | Atom | Atom | Angle/°    | Atom | Atom | Atom | Angle/°    |
|------|------|------|------------|------|------|------|------------|
| C12  | O3   | C15  | 117.22(11) | C7   | C8   | C9   | 125.43(13) |
| C13  | O4   | C16  | 113.71(11) | C10  | C9   | C8   | 122.33(13) |
| O1   | N1   | O2   | 123.60(13) | C10  | C9   | C14  | 115.87(13) |
| O1   | N1   | C1   | 118.54(13) | C14  | C9   | C8   | 121.79(13) |
| O2   | N1   | C1   | 117.86(13) | C11  | C10  | C9   | 122.38(13) |
| C2   | C1   | N1   | 118.31(13) | C10  | C11  | C12  | 120.13(13) |
| C2   | C1   | C6   | 122.20(13) | O3   | C12  | C11  | 125.12(13) |
| C6   | C1   | N1   | 119.49(13) | O3   | C12  | C13  | 115.52(12) |
| C3   | C2   | C1   | 118.24(13) | C11  | C12  | C13  | 119.36(13) |
| C2   | C3   | C4   | 121.63(14) | O4   | C13  | C12  | 120.01(13) |
| C3   | C4   | C7   | 118.13(13) | O4   | C13  | C14  | 121.00(12) |
| C5   | C4   | C3   | 118.21(13) | C14  | C13  | C12  | 118.86(13) |
| C5   | C4   | C7   | 123.66(13) | C9   | C14  | Cl1  | 120.05(11) |
| C6   | C5   | C4   | 120.93(13) | C13  | C14  | Cl1  | 116.73(10) |
| C1   | C6   | C5   | 118.79(13) | C13  | C14  | C9   | 123.22(13) |
| C8   | C7   | C4   | 127.08(14) |      |      |      |            |

**Table S5.** Bond lengths and angles in compound **1a**-noncentro (H atoms removed for clarity).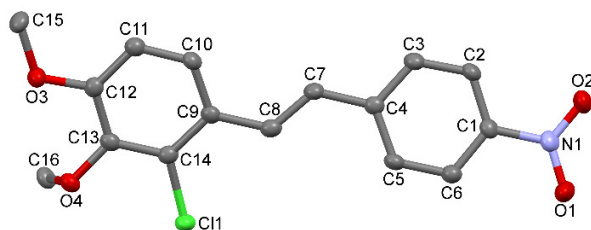

| Atom | Atom | Length/Å | Atom | Atom | Length/Å |
|------|------|----------|------|------|----------|
| Cl1  | C14  | 1.730(3) | C4   | C5   | 1.404(5) |
| O1   | N1   | 1.236(5) | C4   | C7   | 1.466(5) |
| O2   | N1   | 1.223(4) | C5   | C6   | 1.389(5) |
| O3   | C12  | 1.367(4) | C7   | C8   | 1.333(5) |
| O3   | C15  | 1.428(4) | C8   | C9   | 1.466(5) |
| O4   | C13  | 1.365(4) | C9   | C10  | 1.394(5) |
| O4   | C16  | 1.434(4) | C9   | C14  | 1.406(5) |
| N1   | C1   | 1.473(4) | C10  | C11  | 1.391(5) |
| C1   | C2   | 1.389(5) | C11  | C12  | 1.387(5) |
| C1   | C6   | 1.383(5) | C12  | C13  | 1.409(5) |
| C2   | C3   | 1.376(5) | C13  | C14  | 1.403(5) |
| C3   | C4   | 1.398(5) |      |      |          |

| Atom | Atom | Atom | Angle/°  | Atom | Atom | Atom | Angle/°  |
|------|------|------|----------|------|------|------|----------|
| C12  | O3   | C15  | 116.6(3) | C7   | C8   | C9   | 125.9(3) |
| C13  | O4   | C16  | 113.0(3) | C10  | C9   | C8   | 121.6(3) |
| O1   | N1   | C1   | 117.7(3) | C10  | C9   | C14  | 116.9(3) |
| O2   | N1   | O1   | 123.3(3) | C14  | C9   | C8   | 121.5(3) |
| O2   | N1   | C1   | 119.0(3) | C11  | C10  | C9   | 122.5(3) |
| C2   | C1   | N1   | 119.0(3) | C12  | C11  | C10  | 119.7(3) |
| C6   | C1   | N1   | 118.2(3) | O3   | C12  | C11  | 124.4(3) |
| C6   | C1   | C2   | 122.8(3) | O3   | C12  | C13  | 115.5(3) |
| C3   | C2   | C1   | 117.6(3) | C11  | C12  | C13  | 120.0(3) |
| C2   | C3   | C4   | 122.2(3) | O4   | C13  | C12  | 120.3(3) |
| C3   | C4   | C5   | 118.1(3) | O4   | C13  | C14  | 121.0(3) |
| C3   | C4   | C7   | 119.3(3) | C14  | C13  | C12  | 118.7(3) |
| C5   | C4   | C7   | 122.5(3) | C9   | C14  | Cl1  | 121.5(3) |
| C6   | C5   | C4   | 121.0(3) | C13  | C14  | Cl1  | 116.4(2) |
| C1   | C6   | C5   | 118.2(3) | C13  | C14  | C9   | 122.1(3) |
| C8   | C7   | C4   | 125.4(3) |      |      |      |          |

**Table S6.** Bond lengths and angles in compound **4**·Pcell (H atoms removed for clarity).

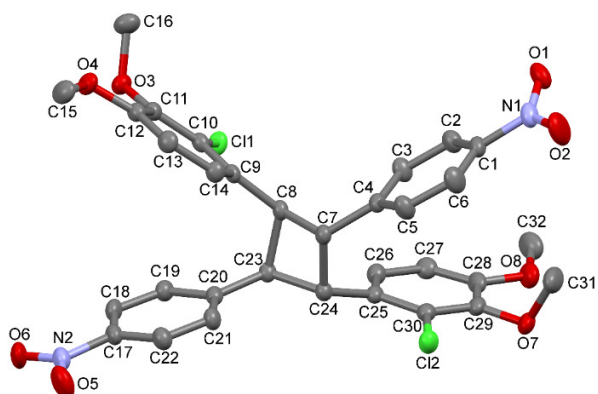

| Atom | Atom | Length/Å   | Atom | Atom | Length/Å   |
|------|------|------------|------|------|------------|
| Cl1  | C10  | 1.7386(15) | C7   | C24  | 1.597(2)   |
| Cl2  | C30  | 1.7380(17) | C8   | C9   | 1.5035(19) |
| O1   | N1   | 1.228(2)   | C8   | C23  | 1.583(2)   |
| O2   | N1   | 1.222(2)   | C9   | C10  | 1.399(2)   |
| O3   | C11  | 1.3707(19) | C9   | C14  | 1.390(2)   |
| O3   | C16  | 1.434(2)   | C10  | C11  | 1.392(2)   |
| O4   | C12  | 1.3613(18) | C11  | C12  | 1.409(2)   |
| O4   | C15  | 1.434(2)   | C12  | C13  | 1.384(2)   |
| O5   | N2   | 1.223(2)   | C13  | C14  | 1.396(2)   |
| O6   | N2   | 1.228(2)   | C17  | C18  | 1.380(3)   |
| O7   | C29  | 1.368(2)   | C17  | C22  | 1.381(2)   |
| O7   | C31  | 1.436(2)   | C18  | C19  | 1.388(2)   |
| O8   | C28  | 1.3702(19) | C19  | C20  | 1.397(2)   |
| O8   | C32  | 1.426(3)   | C20  | C21  | 1.391(2)   |
| N1   | C1   | 1.465(2)   | C20  | C23  | 1.506(2)   |
| N2   | C17  | 1.472(2)   | C21  | C22  | 1.387(2)   |
| C1   | C2   | 1.377(2)   | C23  | C24  | 1.552(2)   |
| C1   | C6   | 1.379(2)   | C24  | C25  | 1.507(2)   |
| C2   | C3   | 1.381(2)   | C25  | C26  | 1.386(2)   |
| C3   | C4   | 1.392(2)   | C25  | C30  | 1.406(2)   |
| C4   | C5   | 1.393(2)   | C26  | C27  | 1.399(2)   |
| C4   | C7   | 1.508(2)   | C27  | C28  | 1.385(2)   |
| C5   | C6   | 1.386(2)   | C28  | C29  | 1.401(3)   |
| C7   | C8   | 1.544(2)   | C29  | C30  | 1.391(2)   |

| Atom | Atom | Atom | Angle/°    | Atom | Atom | Atom | Angle/°    |
|------|------|------|------------|------|------|------|------------|
| C11  | O3   | C16  | 113.76(13) | O4   | C12  | C11  | 115.17(14) |
| C12  | O4   | C15  | 116.64(13) | O4   | C12  | C13  | 125.34(14) |
| C29  | O7   | C31  | 112.63(13) | C13  | C12  | C11  | 119.47(14) |
| C28  | O8   | C32  | 116.24(15) | C12  | C13  | C14  | 120.07(14) |
| O1   | N1   | C1   | 118.02(14) | C9   | C14  | C13  | 122.26(15) |
| O2   | N1   | O1   | 123.55(15) | C18  | C17  | N2   | 119.23(15) |
| O2   | N1   | C1   | 118.43(15) | C18  | C17  | C22  | 122.26(15) |
| O5   | N2   | O6   | 123.24(15) | C22  | C17  | N2   | 118.48(16) |
| O5   | N2   | C17  | 118.49(15) | C17  | C18  | C19  | 118.40(15) |
| O6   | N2   | C17  | 118.25(16) | C18  | C19  | C20  | 121.02(16) |
| C2   | C1   | N1   | 117.87(15) | C19  | C20  | C23  | 117.94(14) |
| C2   | C1   | C6   | 122.01(15) | C21  | C20  | C19  | 118.67(14) |
| C6   | C1   | N1   | 120.11(15) | C21  | C20  | C23  | 123.28(14) |
| C1   | C2   | C3   | 118.69(15) | C22  | C21  | C20  | 121.07(15) |
| C2   | C3   | C4   | 121.46(15) | C17  | C22  | C21  | 118.51(16) |
| C3   | C4   | C5   | 117.99(14) | C20  | C23  | C8   | 112.26(12) |
| C3   | C4   | C7   | 122.06(14) | C20  | C23  | C24  | 116.36(13) |
| C5   | C4   | C7   | 119.92(14) | C24  | C23  | C8   | 88.46(11)  |
| C6   | C5   | C4   | 121.50(16) | C23  | C24  | C7   | 88.34(11)  |
| C1   | C6   | C5   | 118.34(16) | C25  | C24  | C7   | 111.43(12) |
| C4   | C7   | C8   | 118.59(13) | C25  | C24  | C23  | 117.51(13) |
| C4   | C7   | C24  | 120.18(12) | C26  | C25  | C24  | 124.10(14) |
| C8   | C7   | C24  | 88.21(11)  | C26  | C25  | C30  | 116.36(14) |
| C7   | C8   | C23  | 89.15(11)  | C30  | C25  | C24  | 119.09(14) |
| C9   | C8   | C7   | 120.81(12) | C25  | C26  | C27  | 122.52(15) |
| C9   | C8   | C23  | 118.99(12) | C28  | C27  | C26  | 119.70(16) |
| C10  | C9   | C8   | 120.98(13) | O8   | C28  | C27  | 125.43(17) |
| C14  | C9   | C8   | 122.42(14) | O8   | C28  | C29  | 115.09(15) |
| C14  | C9   | C10  | 116.46(13) | C27  | C28  | C29  | 119.48(15) |
| C9   | C10  | C11  | 119.74(11) | O7   | C29  | C28  | 119.81(15) |
| C11  | C10  | C11  | 117.27(12) | O7   | C29  | C30  | 120.89(16) |
| C11  | C10  | C9   | 122.96(13) | C30  | C29  | C28  | 119.30(15) |
| O3   | C11  | C10  | 120.46(13) | C25  | C30  | C12  | 120.19(12) |
| O3   | C11  | C12  | 120.60(13) | C29  | C30  | C12  | 117.42(13) |
| C10  | C11  | C12  | 118.74(14) | C29  | C30  | C25  | 122.37(15) |



**Table S7.** Bond lengths and angles in compound **4**·Ccell (H atoms removed for clarity).

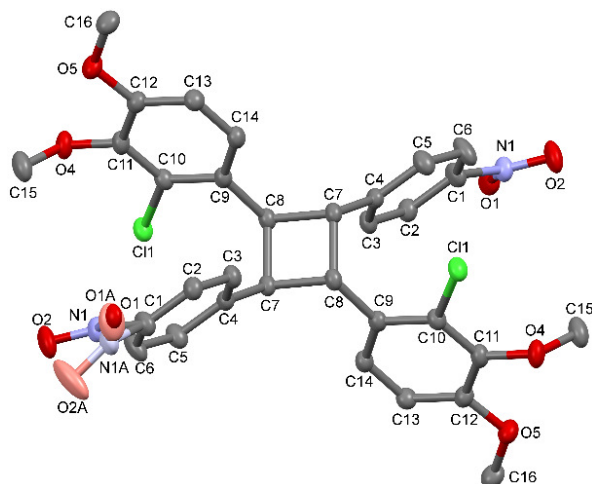

| Atom | Atom | Length/Å   | Atom | Atom            | Length/Å   |
|------|------|------------|------|-----------------|------------|
| Cl1  | C10  | 1.7381(14) | C7   | C8 <sup>1</sup> | 1.5884(19) |
| O4   | C11  | 1.3743(18) | C7   | C8              | 1.5558(18) |
| O4   | C15  | 1.429(2)   | C8   | C9              | 1.5068(19) |
| O5   | C12  | 1.3651(18) | C9   | C10             | 1.4085(19) |
| O5   | C16  | 1.4231(19) | C9   | C14             | 1.383(2)   |
| C1   | C2   | 1.387(2)   | C10  | C11             | 1.389(2)   |
| C1   | C6   | 1.382(2)   | C11  | C12             | 1.401(2)   |
| C1   | N1   | 1.473(5)   | C12  | C13             | 1.386(2)   |
| C1   | N1A  | 1.486(6)   | C13  | C14             | 1.391(2)   |
| C2   | C3   | 1.381(2)   | O1   | N1              | 1.235(8)   |
| C3   | C4   | 1.396(2)   | O2   | N1              | 1.225(5)   |
| C4   | C5   | 1.395(2)   | O1A  | N1A             | 1.226(10)  |
| C4   | C7   | 1.5039(19) | O2A  | N1A             | 1.226(7)   |
| C5   | C6   | 1.385(2)   |      |                 |            |

<sup>1</sup>/2-X,3/2-Y,1-Z

| Atom | Atom | Atom            | Angle/°    | Atom | Atom | Atom | Angle/°    |
|------|------|-----------------|------------|------|------|------|------------|
| C11  | O4   | C15             | 114.08(12) | C10  | C9   | C8   | 119.96(12) |
| C12  | O5   | C16             | 116.96(12) | C14  | C9   | C8   | 123.79(13) |
| C2   | C1   | N1              | 119.6(2)   | C14  | C9   | C10  | 116.23(13) |
| C2   | C1   | N1A             | 115.8(3)   | C9   | C10  | Cl1  | 119.44(11) |
| C6   | C1   | C2              | 122.36(14) | C11  | C10  | Cl1  | 117.74(11) |
| C6   | C1   | N1              | 117.4(2)   | C11  | C10  | C9   | 122.82(13) |
| C6   | C1   | N1A             | 121.3(3)   | O4   | C11  | C10  | 120.31(13) |
| C3   | C2   | C1              | 118.06(14) | O4   | C11  | C12  | 120.76(13) |
| C2   | C3   | C4              | 121.50(14) | C10  | C11  | C12  | 118.88(13) |
| C3   | C4   | C7              | 121.38(13) | O5   | C12  | C11  | 115.80(13) |
| C5   | C4   | C3              | 118.50(13) | O5   | C12  | C13  | 124.76(14) |
| C5   | C4   | C7              | 120.01(13) | C13  | C12  | C11  | 119.44(13) |
| C6   | C5   | C4              | 121.10(14) | C12  | C13  | C14  | 120.14(14) |
| C1   | C6   | C5              | 118.42(15) | C9   | C14  | C13  | 122.47(14) |
| C4   | C7   | C8 <sup>1</sup> | 116.55(11) | O1   | N1   | C1   | 116.6(7)   |
| C4   | C7   | C8              | 116.73(12) | O2   | N1   | C1   | 120.4(4)   |
| C8   | C7   | C8 <sup>1</sup> | 89.66(11)  | O2   | N1   | O1   | 122.9(8)   |
| C7   | C8   | C7 <sup>1</sup> | 90.34(11)  | O1A  | N1A  | C1   | 118.4(10)  |
| C9   | C8   | C7 <sup>1</sup> | 117.97(11) | O1A  | N1A  | O2A  | 124.4(9)   |
| C9   | C8   | C7              | 119.69(12) | O2A  | N1A  | C1   | 116.8(5)   |

<sup>1</sup>/<sub>2</sub>-X,<sup>3</sup>/<sub>2</sub>-Y,<sup>1</sup>-Z

**Table S8.** Bond lengths and angles in compound **1b** (H atoms removed for clarity).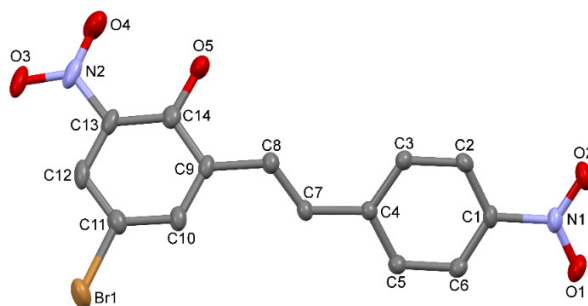

| Atom | Atom | Length/Å | Atom | Atom | Length/Å |
|------|------|----------|------|------|----------|
| Br1  | C11  | 1.897(4) | C4   | C5   | 1.406(4) |
| O1   | N1   | 1.236(5) | C4   | C7   | 1.460(5) |
| O2   | N1   | 1.224(5) | C5   | C6   | 1.388(5) |
| O3   | N2   | 1.223(6) | C7   | C8   | 1.342(5) |
| O4   | N2   | 1.231(7) | C8   | C9   | 1.463(5) |
| O5   | C14  | 1.345(6) | C9   | C10  | 1.395(6) |
| N1   | C1   | 1.463(4) | C9   | C14  | 1.416(6) |
| N2   | C13  | 1.458(6) | C10  | C11  | 1.395(5) |
| C1   | C2   | 1.390(5) | C11  | C12  | 1.377(6) |
| C1   | C6   | 1.385(6) | C12  | C13  | 1.392(7) |
| C2   | C3   | 1.382(5) | C13  | C14  | 1.402(6) |
| C3   | C4   | 1.400(5) |      |      |          |

  

| Atom | Atom | Atom | Angle/°  | Atom | Atom | Atom | Angle/°  |
|------|------|------|----------|------|------|------|----------|
| O1   | N1   | C1   | 117.8(4) | C8   | C7   | C4   | 126.4(3) |
| O2   | N1   | O1   | 123.3(3) | C7   | C8   | C9   | 122.6(4) |
| O2   | N1   | C1   | 119.0(3) | C10  | C9   | C8   | 121.8(4) |
| O3   | N2   | O4   | 122.8(4) | C10  | C9   | C14  | 118.5(4) |
| O3   | N2   | C13  | 118.3(5) | C14  | C9   | C8   | 119.7(4) |
| O4   | N2   | C13  | 118.8(4) | C11  | C10  | C9   | 121.0(4) |
| C2   | C1   | N1   | 118.8(3) | C10  | C11  | Br1  | 119.2(3) |
| C6   | C1   | N1   | 118.6(3) | C12  | C11  | Br1  | 119.3(3) |
| C6   | C1   | C2   | 122.5(3) | C12  | C11  | C10  | 121.5(4) |
| C3   | C2   | C1   | 118.4(3) | C11  | C12  | C13  | 117.6(4) |
| C2   | C3   | C4   | 121.1(3) | C12  | C13  | N2   | 116.7(4) |
| C3   | C4   | C5   | 118.8(3) | C12  | C13  | C14  | 122.9(4) |
| C3   | C4   | C7   | 123.2(3) | C14  | C13  | N2   | 120.3(4) |
| C5   | C4   | C7   | 118.0(3) | O5   | C14  | C9   | 117.2(4) |
| C6   | C5   | C4   | 120.9(3) | O5   | C14  | C13  | 124.3(4) |
| C1   | C6   | C5   | 118.3(3) | C13  | C14  | C9   | 118.4(4) |

**Table S9.** Bond lengths and angles in compound **1c** (only one of the three discrete molecules, H atoms removed for clarity).

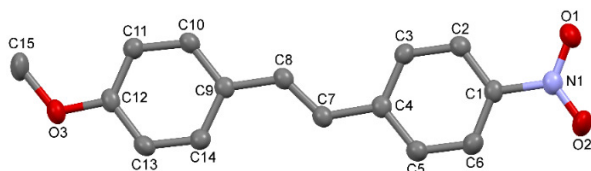

| Atom | Atom | Length/Å   | Atom | Atom | Length/Å   |
|------|------|------------|------|------|------------|
| O1   | N1   | 1.2297(13) | C4   | C7   | 1.4678(15) |
| O2   | N1   | 1.2305(13) | C5   | C6   | 1.3837(16) |
| O3   | C12  | 1.3604(13) | C7   | C8   | 1.3399(16) |
| O3   | C15  | 1.4327(16) | C8   | C9   | 1.4618(15) |
| N1   | C1   | 1.4631(14) | C9   | C10  | 1.3964(16) |
| C1   | C2   | 1.3848(16) | C9   | C14  | 1.4048(16) |
| C1   | C6   | 1.3837(16) | C10  | C11  | 1.3885(16) |
| C2   | C3   | 1.3811(16) | C11  | C12  | 1.3923(16) |
| C3   | C4   | 1.4029(16) | C12  | C13  | 1.3952(17) |
| C4   | C5   | 1.4018(16) | C13  | C14  | 1.3765(16) |

| Atom | Atom | Atom | Angle/°    | Atom | Atom | Atom | Angle/°    |
|------|------|------|------------|------|------|------|------------|
| C12  | O3   | C15  | 117.54(9)  | C5   | C6   | C1   | 118.29(11) |
| O1   | N1   | O2   | 123.08(10) | C8   | C7   | C4   | 126.29(11) |
| O1   | N1   | C1   | 118.65(10) | C7   | C8   | C9   | 127.45(11) |
| O2   | N1   | C1   | 118.27(10) | C10  | C9   | C8   | 119.77(10) |
| C2   | C1   | N1   | 118.62(10) | C10  | C9   | C14  | 116.96(10) |
| C6   | C1   | N1   | 119.32(10) | C14  | C9   | C8   | 123.27(10) |
| C6   | C1   | C2   | 122.06(10) | C11  | C10  | C9   | 122.63(10) |
| C3   | C2   | C1   | 118.91(10) | C10  | C11  | C12  | 119.11(10) |
| C2   | C3   | C4   | 121.10(10) | O3   | C12  | C11  | 124.94(11) |
| C3   | C4   | C7   | 122.90(10) | O3   | C12  | C13  | 115.78(10) |
| C5   | C4   | C3   | 118.00(10) | C11  | C12  | C13  | 119.27(10) |
| C5   | C4   | C7   | 119.10(10) | C14  | C13  | C12  | 120.91(10) |
| C6   | C5   | C4   | 121.65(11) | C13  | C14  | C9   | 121.11(11) |

**Table S10.** Bond lengths and angles in compound **1d** (H atoms removed for clarity).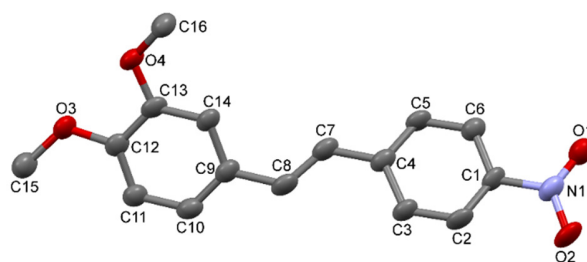

| Atom | Atom | Length/Å | Atom | Atom | Length/Å |
|------|------|----------|------|------|----------|
| O1   | N1   | 1.223(4) | C4   | C5   | 1.393(4) |
| O2   | N1   | 1.234(3) | C4   | C7   | 1.461(4) |
| O3   | C12  | 1.371(4) | C5   | C6   | 1.379(4) |
| O3   | C15  | 1.426(4) | C7   | C8   | 1.330(5) |
| O4   | C13  | 1.369(4) | C8   | C9   | 1.459(4) |
| O4   | C16  | 1.429(4) | C9   | C10  | 1.387(5) |
| N1   | C1   | 1.460(4) | C9   | C14  | 1.411(4) |
| C1   | C2   | 1.380(5) | C10  | C11  | 1.397(4) |
| C1   | C6   | 1.379(4) | C11  | C12  | 1.380(5) |
| C2   | C3   | 1.370(4) | C12  | C13  | 1.400(5) |
| C3   | C4   | 1.406(4) | C13  | C14  | 1.382(4) |

| Atom | Atom | Atom | Angle/°  | Atom | Atom | Atom | Angle/°  |
|------|------|------|----------|------|------|------|----------|
| C12  | O3   | C15  | 117.8(3) | C8   | C7   | C4   | 128.1(3) |
| C13  | O4   | C16  | 117.8(2) | C7   | C8   | C9   | 125.7(3) |
| O1   | N1   | O2   | 122.7(3) | C10  | C9   | C8   | 120.3(3) |
| O1   | N1   | C1   | 119.4(3) | C10  | C9   | C14  | 118.0(3) |
| O2   | N1   | C1   | 117.9(3) | C14  | C9   | C8   | 121.7(3) |
| C2   | C1   | N1   | 120.1(3) | C9   | C10  | C11  | 121.5(3) |
| C6   | C1   | N1   | 118.5(3) | C12  | C11  | C10  | 119.8(3) |
| C6   | C1   | C2   | 121.4(3) | O3   | C12  | C11  | 125.2(3) |
| C3   | C2   | C1   | 119.5(3) | O3   | C12  | C13  | 115.0(3) |
| C2   | C3   | C4   | 120.8(3) | C11  | C12  | C13  | 119.7(3) |
| C3   | C4   | C7   | 122.7(3) | O4   | C13  | C12  | 115.3(3) |
| C5   | C4   | C3   | 118.0(3) | O4   | C13  | C14  | 124.5(3) |
| C5   | C4   | C7   | 119.3(3) | C14  | C13  | C12  | 120.2(3) |
| C6   | C5   | C4   | 121.5(3) | C13  | C14  | C9   | 120.7(3) |
| C5   | C6   | C1   | 118.7(3) |      |      |      |          |

**Table S11.** Bond lengths and angles in compound **1e** (60:40 site occupancies, bond parameters of only the main component A are listed in the table, H atoms removed for clarity).

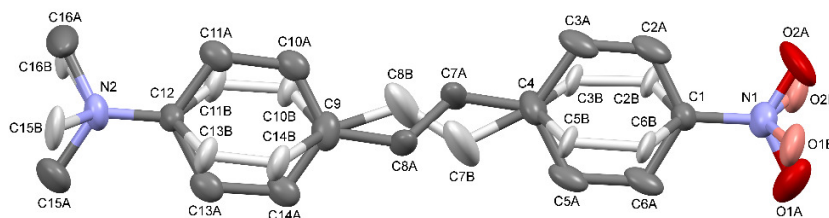

| Atom | Atom | Length/Å  | Atom | Atom | Length/Å  |
|------|------|-----------|------|------|-----------|
| N1   | O1A  | 1.233(10) | C6A  | C1   | 1.399(9)  |
| N1   | O2A  | 1.209(10) | C7A  | C8A  | 1.304(7)  |
| N1   | C1   | 1.460(4)  | C7A  | C4   | 1.467(6)  |
| N2   | C15A | 1.439(12) | C8A  | C9   | 1.436(6)  |
| N2   | C16A | 1.451(14) | C10A | C11A | 1.421(12) |
| N2   | C12  | 1.379(4)  | C10A | C9   | 1.342(10) |
| C2A  | C3A  | 1.342(13) | C11A | C12  | 1.397(9)  |
| C2A  | C1   | 1.357(10) | C13A | C14A | 1.408(12) |
| C3A  | C4   | 1.440(9)  | C13A | C12  | 1.422(10) |
| C5A  | C6A  | 1.388(13) | C14A | C9   | 1.351(10) |
| C5A  | C4   | 1.435(11) |      |      |           |

| Atom | Atom | Atom | Angle/°  | Atom | Atom | Atom | Angle/°  |
|------|------|------|----------|------|------|------|----------|
| O1A  | N1   | C1   | 118.1(6) | C14A | C13A | C12  | 120.8(7) |
| O2A  | N1   | O1A  | 122.4(7) | C9   | C14A | C13A | 122.1(8) |
| O2A  | N1   | C1   | 119.4(6) | C2A  | C1   | N1   | 118.5(5) |
| C15A | N2   | C16A | 117.2(7) | C2A  | C1   | C6A  | 122.3(6) |
| C12  | N2   | C15A | 119.6(6) | C6A  | C1   | N1   | 119.2(5) |
| C12  | N2   | C16A | 119.8(6) | C3A  | C4   | C7A  | 117.2(6) |
| C3A  | C2A  | C1   | 120.4(7) | C5A  | C4   | C3A  | 117.2(6) |
| C2A  | C3A  | C4   | 121.3(8) | C5A  | C4   | C7A  | 125.6(6) |
| C6A  | C5A  | C4   | 119.8(6) | C10A | C9   | C8A  | 125.3(6) |
| C5A  | C6A  | C1   | 118.9(8) | C10A | C9   | C14A | 117.6(6) |
| C8A  | C7A  | C4   | 127.7(5) | C14A | C9   | C8A  | 117.2(6) |
| C7A  | C8A  | C9   | 127.2(5) | N2   | C12  | C11A | 122.3(5) |
| C9   | C10A | C11A | 124.0(7) | N2   | C12  | C13A | 121.4(5) |
| C12  | C11A | C10A | 119.3(7) | C11A | C12  | C13A | 116.3(6) |

**Table S12.** Bond lengths and angles in compound **2a** (40:40:20 site occupancies, bond parameters of only the main component A are listed in the table, H atoms removed for clarity).

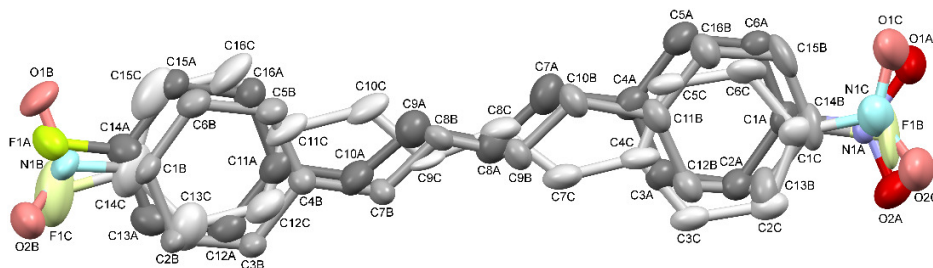

| Atom | Atom | Length/Å  | Atom | Atom | Length/Å  |
|------|------|-----------|------|------|-----------|
| F1A  | C14A | 1.304(11) | C7A  | C8A  | 1.283(15) |
| O1A  | N1A  | 1.296(13) | C8A  | C9A  | 1.433(12) |
| O2A  | N1A  | 1.215(12) | C9A  | C10A | 1.313(13) |
| N1A  | C1A  | 1.448(11) | C10A | C11A | 1.399(11) |
| C1A  | C2A  | 1.418(10) | C11A | C12A | 1.388(15) |
| C1A  | C6A  | 1.371(9)  | C11A | C16A | 1.366(11) |
| C2A  | C3A  | 1.326(10) | C12A | C13A | 1.353(12) |
| C3A  | C4A  | 1.381(10) | C13A | C14A | 1.310(11) |
| C4A  | C5A  | 1.420(11) | C14A | C15A | 1.439(10) |
| C4A  | C7A  | 1.488(10) | C15A | C16A | 1.343(10) |
| C5A  | C6A  | 1.334(11) |      |      |           |

| Atom | Atom | Atom | Angle/°   | Atom | Atom | Atom | Angle/°   |
|------|------|------|-----------|------|------|------|-----------|
| O1A  | N1A  | C1A  | 120.9(7)  | C7A  | C8A  | C9A  | 125.7(13) |
| O2A  | N1A  | O1A  | 121.9(9)  | C10A | C9A  | C8A  | 127.9(11) |
| O2A  | N1A  | C1A  | 117.1(9)  | C9A  | C10A | C11A | 129.7(9)  |
| C2A  | C1A  | N1A  | 119.5(7)  | C12A | C11A | C10A | 119.9(10) |
| C6A  | C1A  | N1A  | 116.3(8)  | C16A | C11A | C10A | 118.9(10) |
| C6A  | C1A  | C2A  | 124.1(8)  | C16A | C11A | C12A | 121.1(9)  |
| C3A  | C2A  | C1A  | 117.8(7)  | C13A | C12A | C11A | 121.8(9)  |
| C2A  | C3A  | C4A  | 120.0(7)  | C14A | C13A | C12A | 116.6(7)  |
| C3A  | C4A  | C5A  | 120.6(7)  | F1A  | C14A | C13A | 116.5(8)  |
| C3A  | C4A  | C7A  | 119.2(8)  | F1A  | C14A | C15A | 119.5(7)  |
| C5A  | C4A  | C7A  | 120.2(7)  | C13A | C14A | C15A | 124.0(8)  |
| C6A  | C5A  | C4A  | 120.8(7)  | C16A | C15A | C14A | 118.2(7)  |
| C5A  | C6A  | C1A  | 116.7(8)  | C15A | C16A | C11A | 118.3(8)  |
| C8A  | C7A  | C4A  | 129.8(10) |      |      |      |           |

**Table S13.** Bond lengths and angles in compound **3a**-mono (only one of the two discrete molecules shown, H atoms removed for clarity).

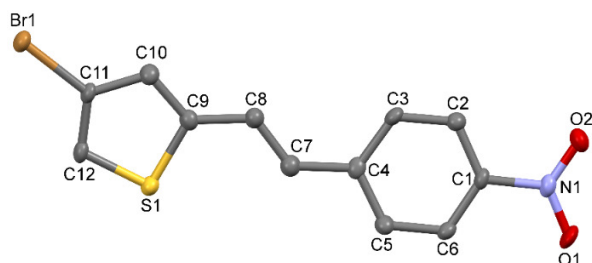

| Atom | Atom | Length/Å | Atom | Atom | Length/Å |
|------|------|----------|------|------|----------|
| Br1  | C11  | 1.886(3) | C3   | C4   | 1.405(4) |
| S1   | C9   | 1.731(3) | C4   | C5   | 1.397(4) |
| S1   | C12  | 1.712(3) | C4   | C7   | 1.461(4) |
| O1   | N1   | 1.230(3) | C5   | C6   | 1.378(4) |
| O2   | N1   | 1.224(3) | C7   | C8   | 1.333(4) |
| N1   | C1   | 1.464(3) | C8   | C9   | 1.444(4) |
| C1   | C2   | 1.385(4) | C9   | C10  | 1.361(4) |
| C1   | C6   | 1.379(4) | C10  | C11  | 1.407(4) |
| C2   | C3   | 1.378(4) | C11  | C12  | 1.351(4) |

| Atom | Atom | Atom | Angle/°   | Atom | Atom | Atom | Angle/°  |
|------|------|------|-----------|------|------|------|----------|
| C12  | S1   | C9   | 92.25(14) | C6   | C5   | C4   | 121.3(3) |
| O1   | N1   | C1   | 118.1(3)  | C5   | C6   | C1   | 118.5(3) |
| O2   | N1   | O1   | 123.2(2)  | C8   | C7   | C4   | 128.1(3) |
| O2   | N1   | C1   | 118.7(3)  | C7   | C8   | C9   | 124.5(3) |
| C2   | C1   | N1   | 119.5(3)  | C8   | C9   | S1   | 121.6(2) |
| C6   | C1   | N1   | 118.1(3)  | C10  | C9   | S1   | 110.5(2) |
| C6   | C1   | C2   | 122.4(3)  | C10  | C9   | C8   | 127.9(3) |
| C3   | C2   | C1   | 118.5(3)  | C9   | C10  | C11  | 112.5(3) |
| C2   | C3   | C4   | 121.0(3)  | C10  | C11  | Br1  | 123.4(2) |
| C3   | C4   | C7   | 123.9(3)  | C12  | C11  | Br1  | 122.4(2) |
| C5   | C4   | C3   | 118.4(3)  | C12  | C11  | C10  | 114.2(3) |
| C5   | C4   | C7   | 117.7(3)  | C11  | C12  | S1   | 110.6(2) |



**Table S14.** Bond lengths and angles in compound **3a**-ortho (H atoms removed for clarity).

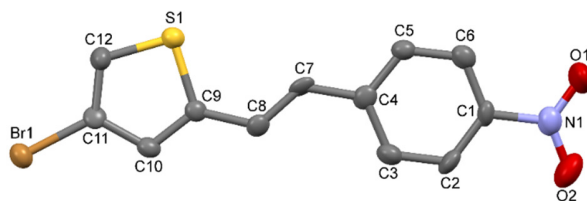

| Atom | Atom | Length/Å  | Atom | Atom | Length/Å  |
|------|------|-----------|------|------|-----------|
| Br1  | C11  | 1.897(10) | C3   | C4   | 1.431(14) |
| S1   | C9   | 1.749(10) | C4   | C5   | 1.399(14) |
| S1   | C12  | 1.714(10) | C4   | C7   | 1.469(13) |
| O1   | N1   | 1.220(12) | C5   | C6   | 1.387(13) |
| O2   | N1   | 1.227(12) | C7   | C8   | 1.339(14) |
| N1   | C1   | 1.476(12) | C8   | C9   | 1.462(13) |
| C1   | C2   | 1.383(14) | C9   | C10  | 1.363(13) |
| C1   | C6   | 1.397(14) | C10  | C11  | 1.414(13) |
| C2   | C3   | 1.387(13) | C11  | C12  | 1.352(14) |

| Atom | Atom | Atom | Angle/°   | Atom | Atom | Atom | Angle/°   |
|------|------|------|-----------|------|------|------|-----------|
| C12  | S1   | C9   | 91.5(5)   | C6   | C5   | C4   | 122.0(9)  |
| O1   | N1   | O2   | 123.9(10) | C5   | C6   | C1   | 118.3(10) |
| O1   | N1   | C1   | 118.3(9)  | C8   | C7   | C4   | 128.7(9)  |
| O2   | N1   | C1   | 117.8(9)  | C7   | C8   | C9   | 125.3(9)  |
| C2   | C1   | N1   | 119.6(9)  | C8   | C9   | S1   | 120.6(7)  |
| C2   | C1   | C6   | 122.0(9)  | C10  | C9   | S1   | 110.3(7)  |
| C6   | C1   | N1   | 118.4(9)  | C10  | C9   | C8   | 129.1(9)  |
| C1   | C2   | C3   | 119.5(9)  | C9   | C10  | C11  | 113.1(9)  |
| C2   | C3   | C4   | 120.3(10) | C10  | C11  | Br1  | 123.7(7)  |
| C3   | C4   | C7   | 122.8(9)  | C12  | C11  | Br1  | 123.1(7)  |
| C5   | C4   | C3   | 117.9(9)  | C12  | C11  | C10  | 113.1(9)  |
| C5   | C4   | C7   | 119.3(9)  | C11  | C12  | S1   | 111.9(8)  |

**Table S15.** Bond lengths and angles in compound **3b** (only one of the two discrete molecules shown, H atoms removed for clarity).

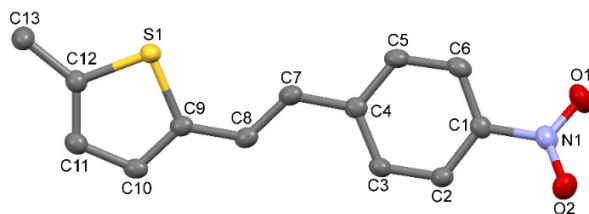

| Atom | Atom | Length/Å   | Atom | Atom | Length/Å   |
|------|------|------------|------|------|------------|
| S1   | C9   | 1.7352(14) | C5   | C6   | 1.383(2)   |
| S1   | C12  | 1.7317(16) | C7   | C8   | 1.342(2)   |
| O1   | N1   | 1.2299(19) | C8   | C9   | 1.444(2)   |
| O2   | N1   | 1.2259(19) | C9   | C10  | 1.370(2)   |
| N1   | C1   | 1.4612(19) | C10  | C11  | 1.417(2)   |
| C1   | C2   | 1.385(2)   | C11  | C12  | 1.365(2)   |
| C1   | C6   | 1.382(2)   | C12  | C13  | 1.496(2)   |
| C2   | C3   | 1.376(2)   | S2   | C22  | 1.7399(14) |
| C3   | C4   | 1.405(2)   | S2   | C25  | 1.7315(15) |
| C4   | C5   | 1.407(2)   | O3   | N2   | 1.2252(19) |
| C4   | C7   | 1.460(2)   | O4   | N2   | 1.2323(18) |

| Atom | Atom | Atom | Angle/°    | Atom | Atom | Atom | Angle/°    |
|------|------|------|------------|------|------|------|------------|
| C12  | S1   | C9   | 92.39(7)   | C6   | C5   | C4   | 121.55(14) |
| O1   | N1   | C1   | 117.97(14) | C1   | C6   | C5   | 118.09(14) |
| O2   | N1   | O1   | 123.50(14) | C8   | C7   | C4   | 125.78(13) |
| O2   | N1   | C1   | 118.51(13) | C7   | C8   | C9   | 126.14(13) |
| C2   | C1   | N1   | 118.30(13) | C8   | C9   | S1   | 122.87(11) |
| C6   | C1   | N1   | 119.23(14) | C10  | C9   | S1   | 110.12(11) |
| C6   | C1   | C2   | 122.47(14) | C10  | C9   | C8   | 126.90(13) |
| C3   | C2   | C1   | 118.74(13) | C9   | C10  | C11  | 113.65(13) |
| C2   | C3   | C4   | 121.20(14) | C12  | C11  | C10  | 113.07(14) |
| C3   | C4   | C5   | 117.91(14) | C11  | C12  | S1   | 110.77(11) |
| C3   | C4   | C7   | 122.93(14) | C11  | C12  | C13  | 128.98(15) |
| C5   | C4   | C7   | 119.16(13) | C13  | C12  | S1   | 120.22(12) |

**Table S16.** Bond lengths and angles in compound **3c** (H atoms removed for clarity).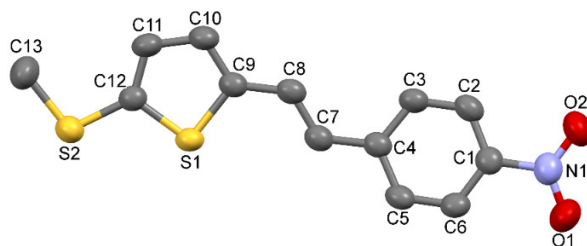

| Atom | Atom | Length/Å | Atom | Atom | Length/Å |
|------|------|----------|------|------|----------|
| S1   | C9   | 1.739(3) | C3   | C4   | 1.402(3) |
| S1   | C12  | 1.728(3) | C4   | C5   | 1.400(3) |
| S2   | C12  | 1.740(3) | C4   | C7   | 1.456(4) |
| S2   | C13  | 1.783(3) | C5   | C6   | 1.374(4) |
| O1   | N1   | 1.222(3) | C7   | C8   | 1.333(3) |
| O2   | N1   | 1.226(3) | C8   | C9   | 1.438(4) |
| N1   | C1   | 1.461(3) | C9   | C10  | 1.360(4) |
| C1   | C2   | 1.378(4) | C10  | C11  | 1.410(4) |
| C1   | C6   | 1.377(3) | C11  | C12  | 1.365(3) |
| C2   | C3   | 1.371(4) |      |      |          |

| Atom | Atom | Atom | Angle/°    | Atom | Atom | Atom | Angle/°    |
|------|------|------|------------|------|------|------|------------|
| C12  | S1   | C9   | 92.14(12)  | C6   | C5   | C4   | 121.5(2)   |
| C12  | S2   | C13  | 101.69(14) | C5   | C6   | C1   | 118.8(2)   |
| O1   | N1   | O2   | 123.1(3)   | C8   | C7   | C4   | 126.8(2)   |
| O1   | N1   | C1   | 118.1(2)   | C7   | C8   | C9   | 127.0(2)   |
| O2   | N1   | C1   | 118.8(3)   | C8   | C9   | S1   | 121.53(19) |
| C2   | C1   | N1   | 119.1(2)   | C10  | C9   | S1   | 110.0(2)   |
| C6   | C1   | N1   | 119.2(2)   | C10  | C9   | C8   | 128.5(2)   |
| C6   | C1   | C2   | 121.7(3)   | C9   | C10  | C11  | 114.2(2)   |
| C3   | C2   | C1   | 119.0(2)   | C12  | C11  | C10  | 112.8(2)   |
| C2   | C3   | C4   | 121.3(2)   | S1   | C12  | S2   | 117.46(14) |
| C3   | C4   | C7   | 122.8(2)   | C11  | C12  | S1   | 110.9(2)   |
| C5   | C4   | C3   | 117.6(2)   | C11  | C12  | S2   | 131.7(2)   |
| C5   | C4   | C7   | 119.6(2)   |      |      |      |            |

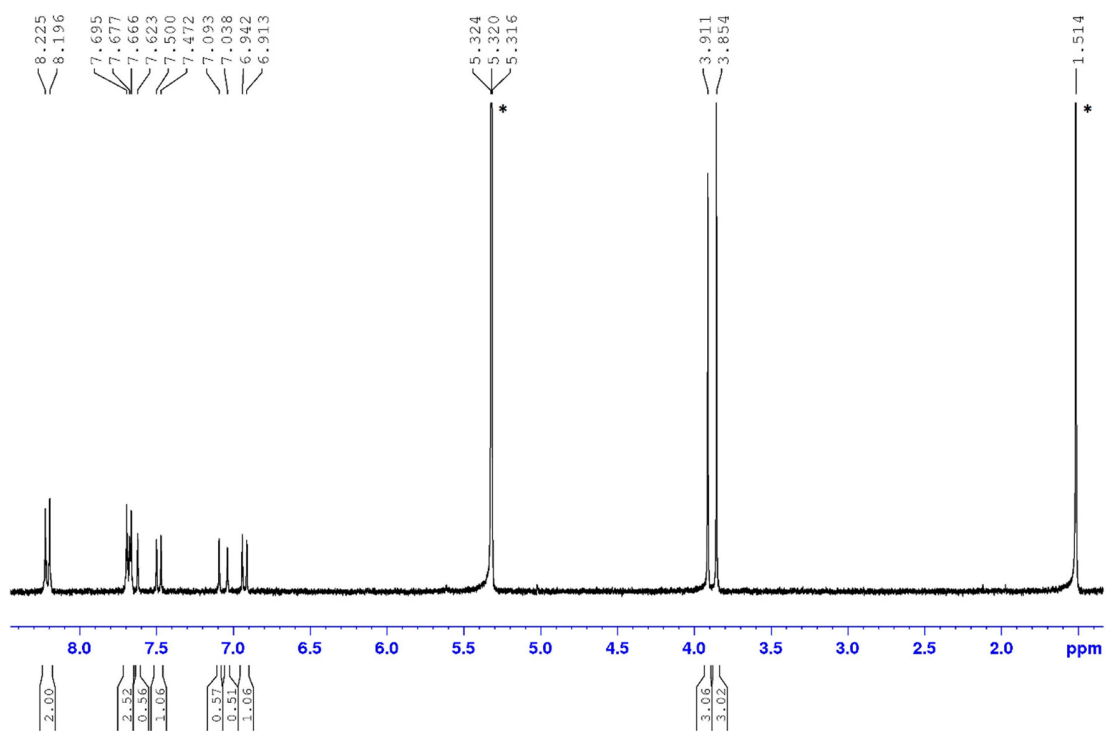

**Figure S1.**  $^1\text{H}$  NMR spectrum of compound **1a** (\*solvent and solvent impurity peaks).

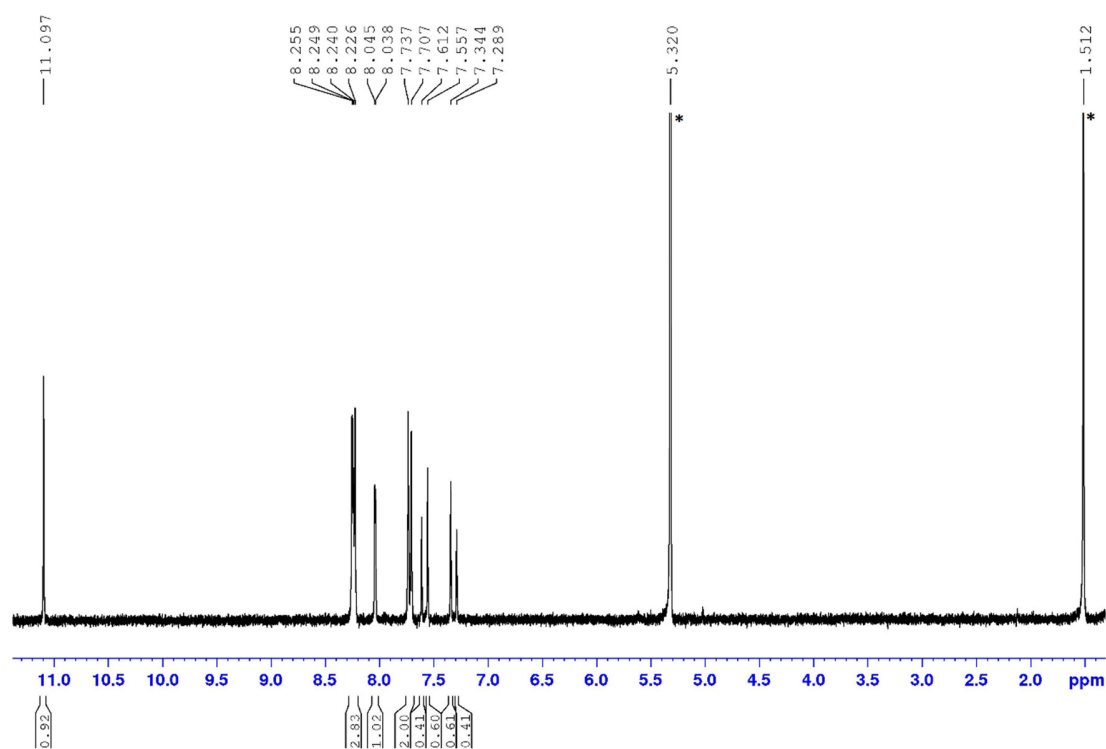

**Figure S2.**  $^1\text{H}$  NMR spectrum of compound **1b** (\*solvent and solvent impurity peaks).

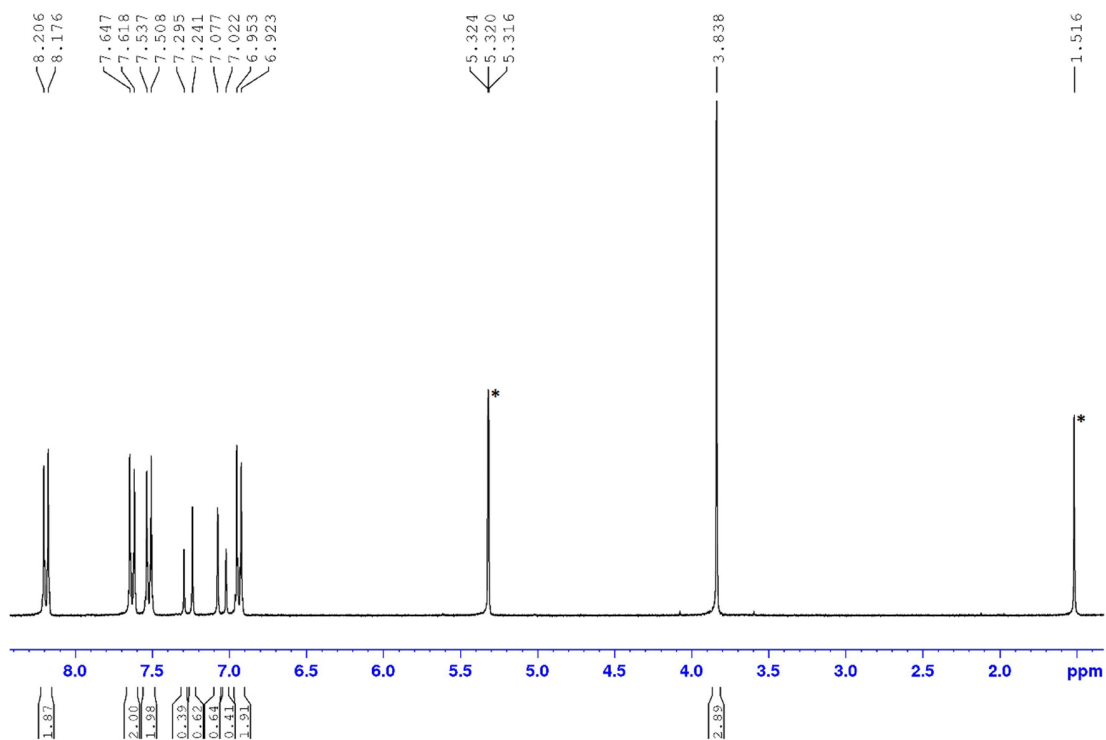

**Figure S3.**  $^1\text{H}$  NMR spectrum of compound **1c** (\*solvent and solvent impurity peaks).

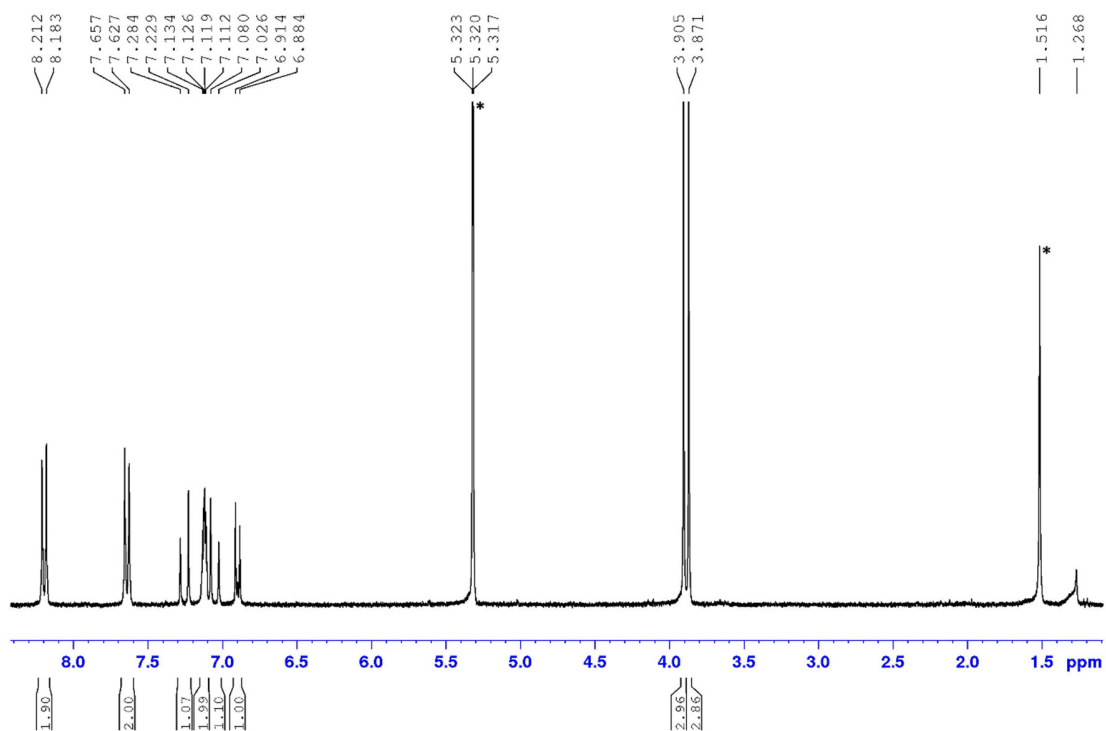

**Figure S4.**  $^1\text{H}$  NMR spectrum of compound **1d** (\*solvent and solvent impurity peaks).

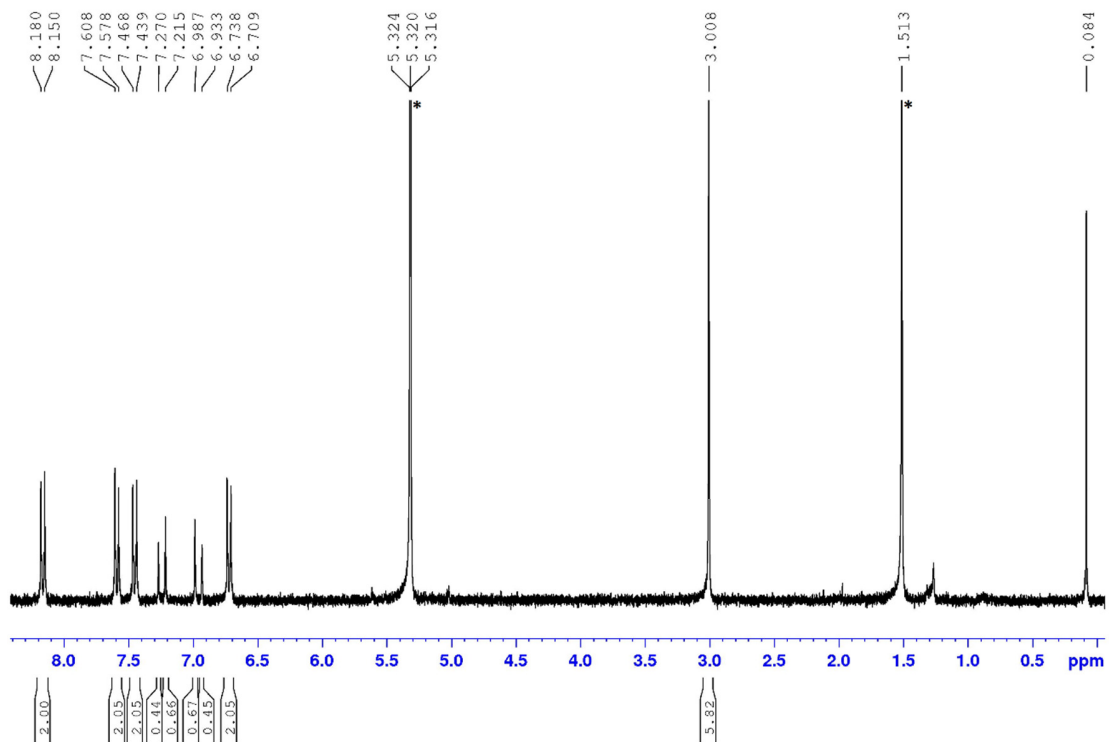

Figure S5.  $^1\text{H}$  NMR spectrum of compound **1e** (\*solvent and solvent impurity peaks).

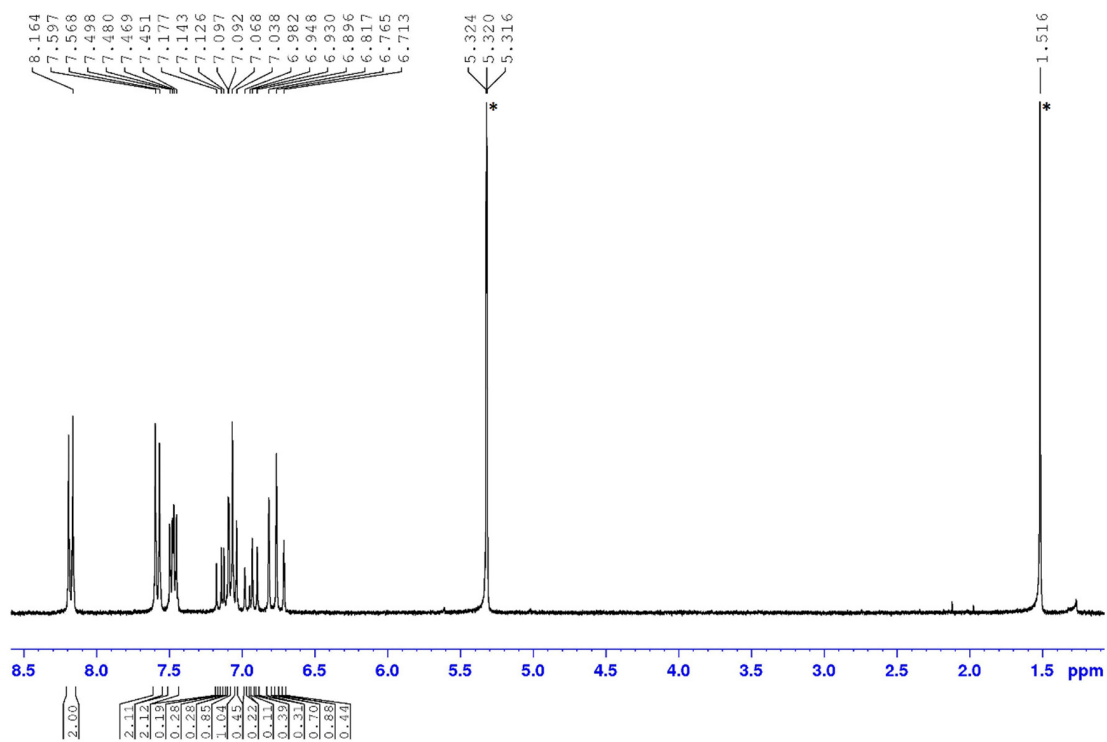

Figure S6.  $^1\text{H}$  NMR spectrum of compound **2a** (\*solvent and solvent impurity peaks).

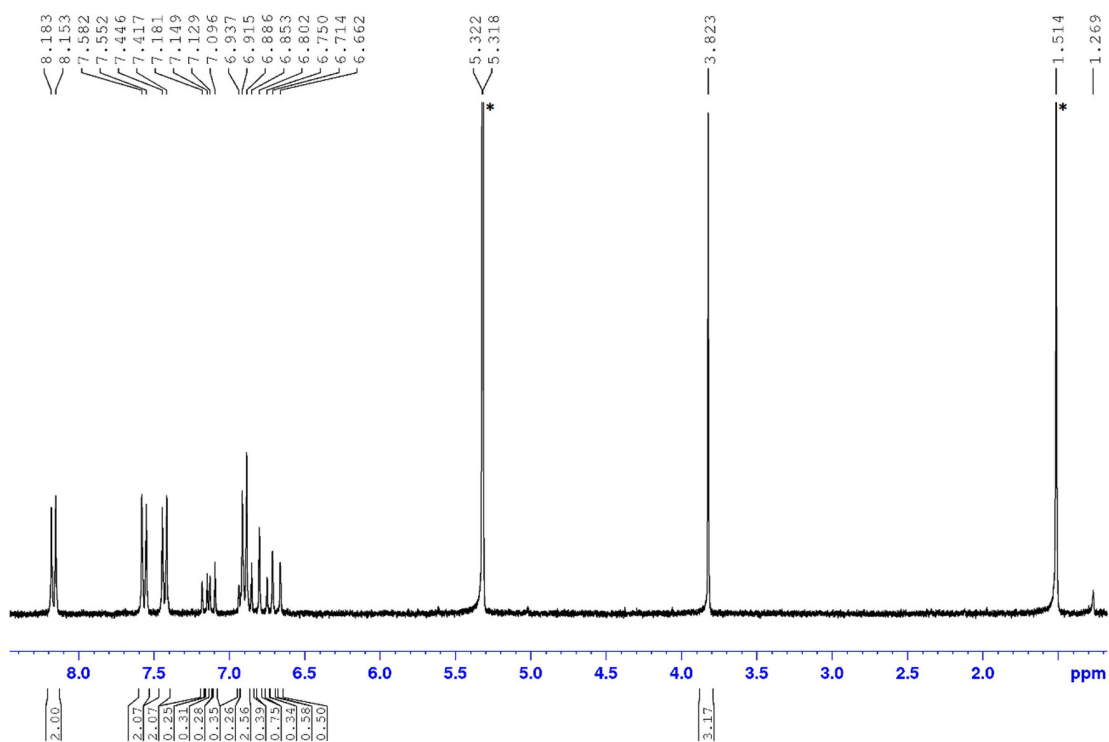

**Figure S7.**  $^1\text{H}$  NMR spectrum of compound **2b** (\*solvent and solvent impurity peaks).

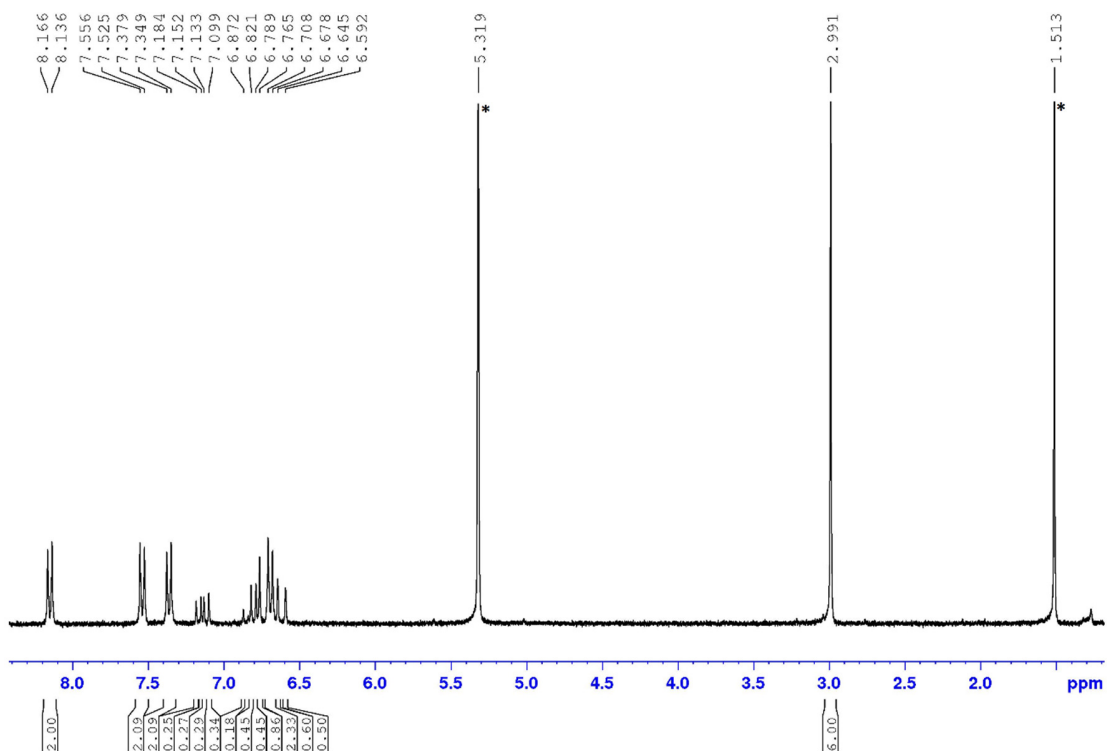

**Figure S8.**  $^1\text{H}$  NMR spectrum of compound **2c** (\*solvent and solvent impurity peaks).

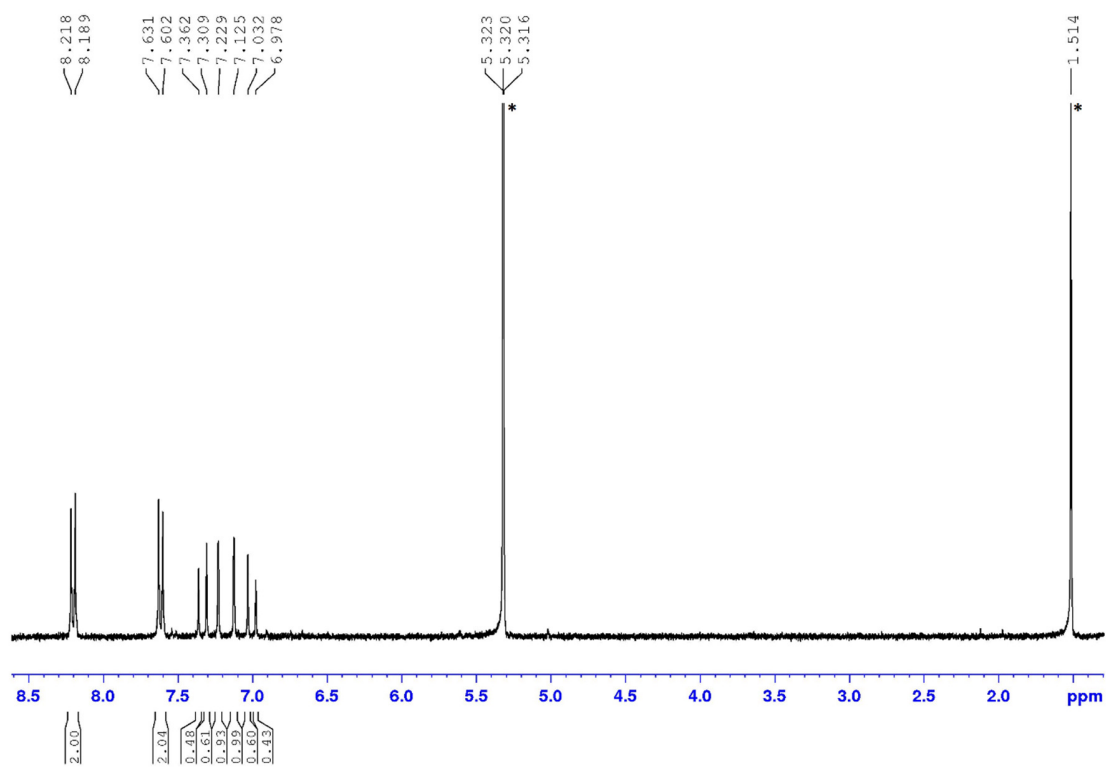

**Figure S9.**  $^1\text{H}$  NMR spectrum of compound **3a** (\*solvent and solvent impurity peaks).

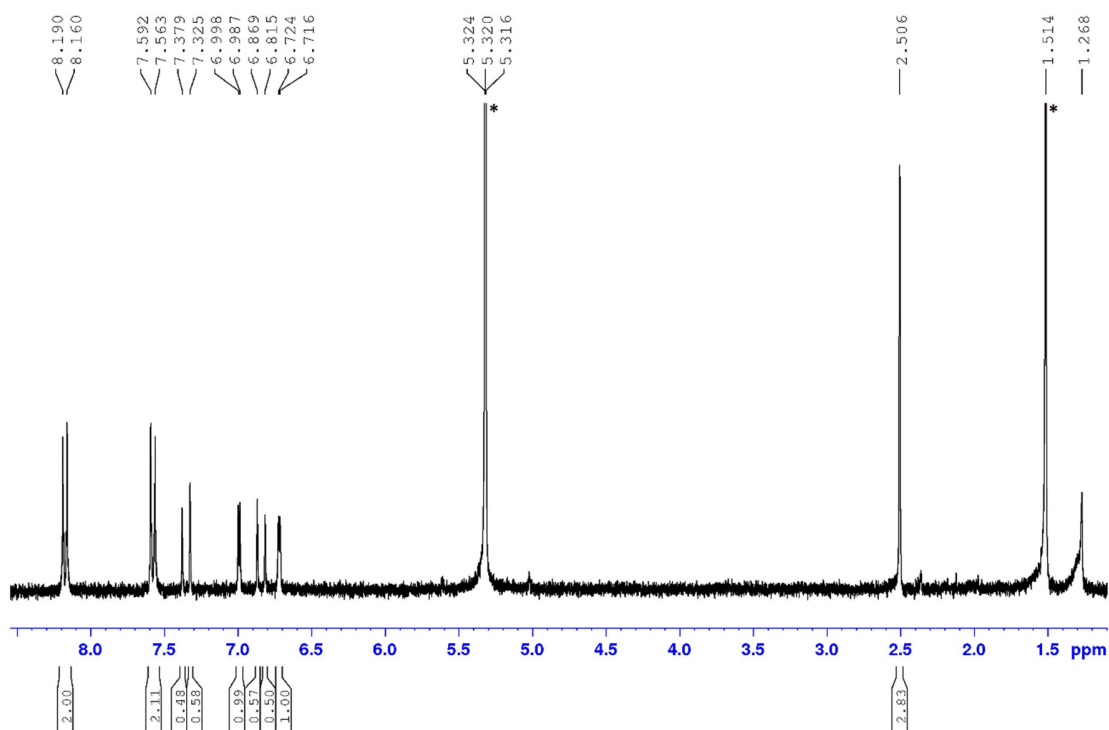

**Figure S10.**  $^1\text{H}$  NMR spectrum of compound **3b** (\*solvent and solvent impurity peaks).



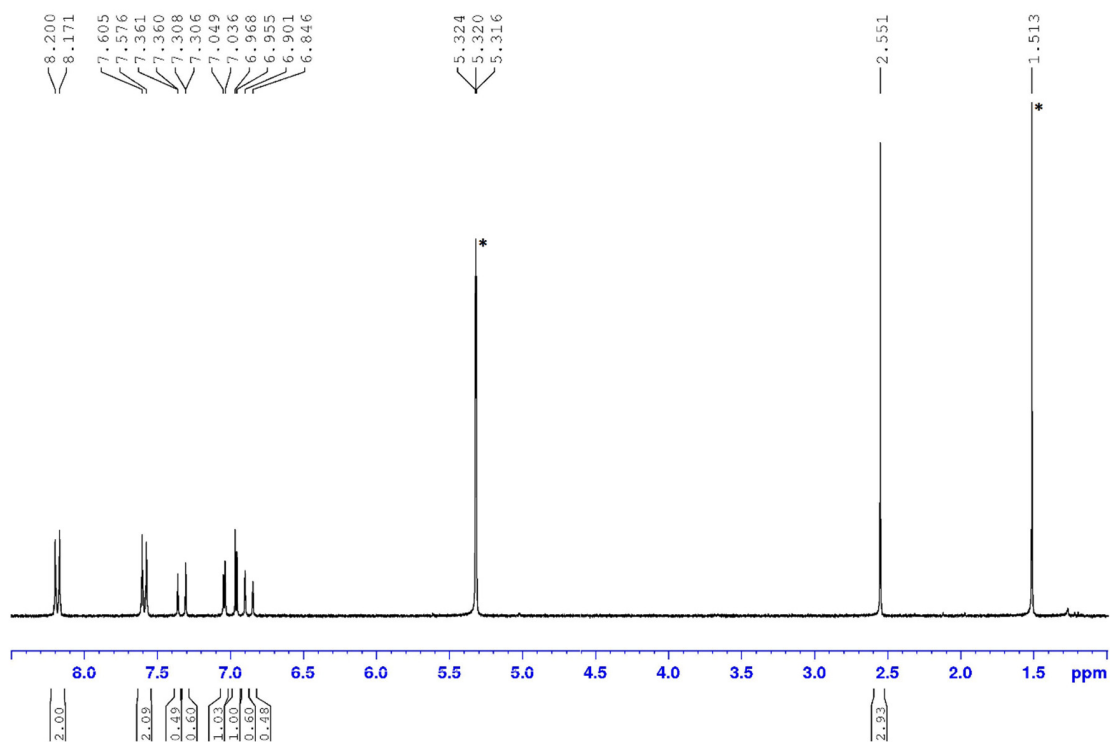

Figure S11.  $^1\text{H}$  NMR spectrum of compound **3c** (\*solvent and solvent impurity peaks).

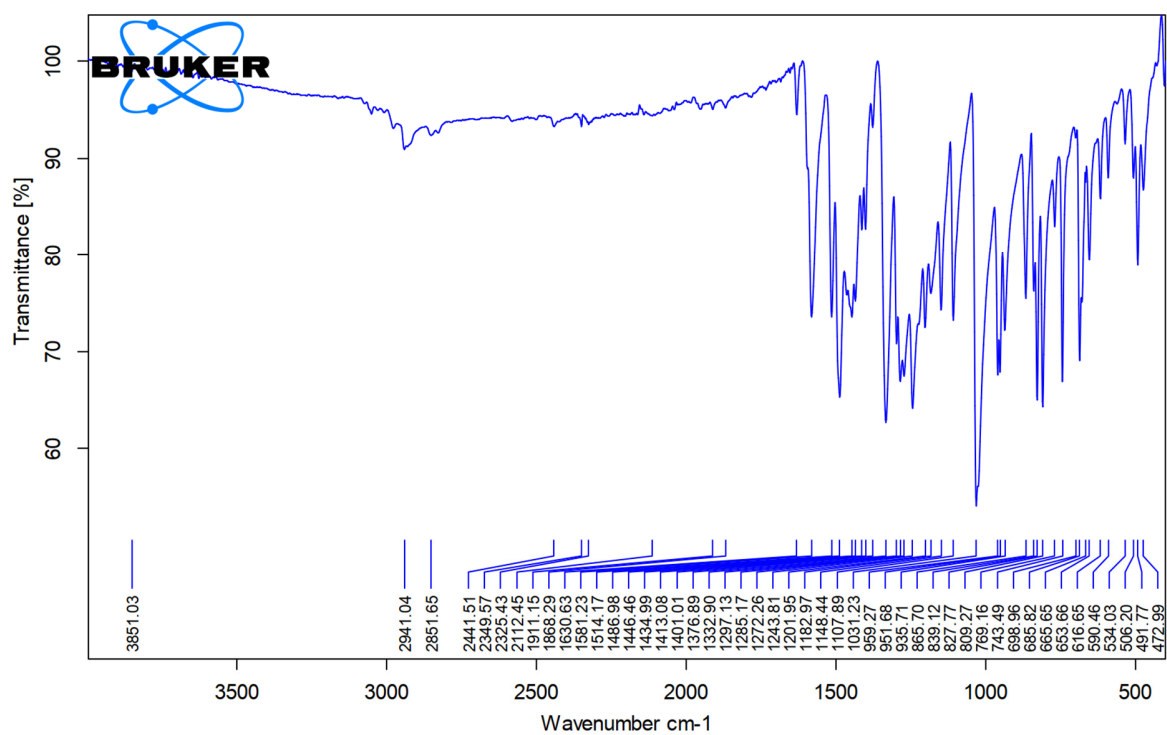

Figure S12. IR spectrum of compound **1a**.

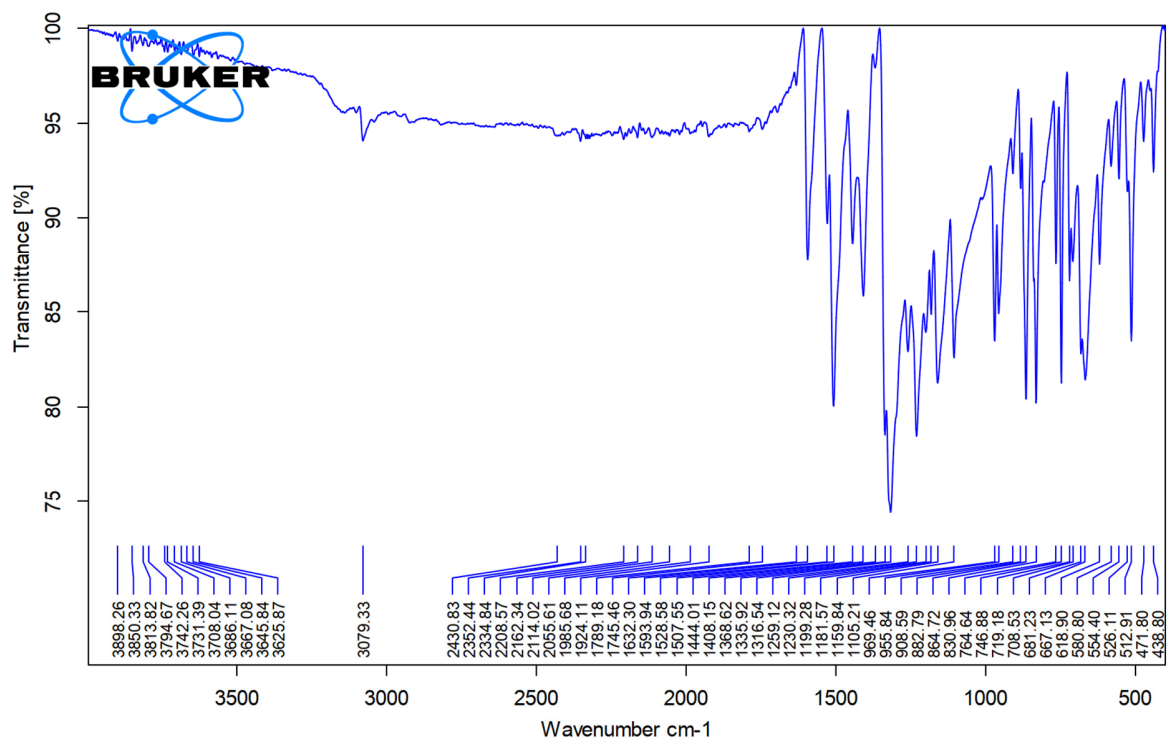

Figure S13. IR spectrum of compound **1b**.

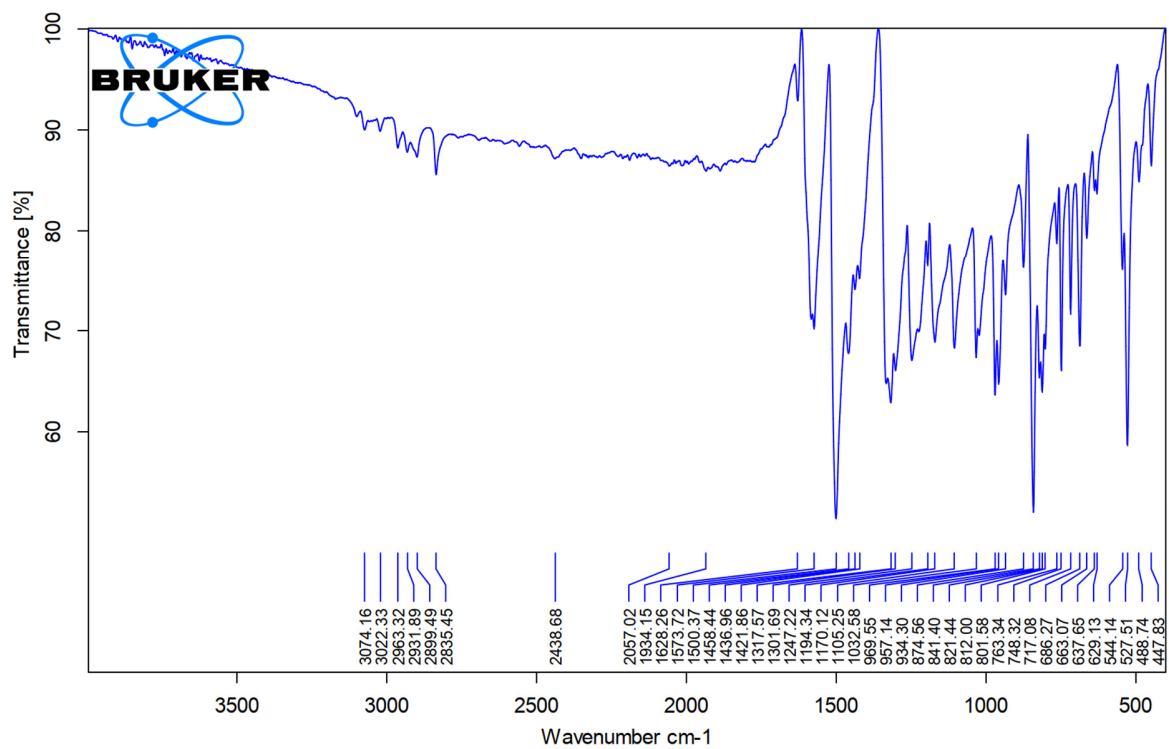

Figure S14. IR spectrum of compound **1c**.

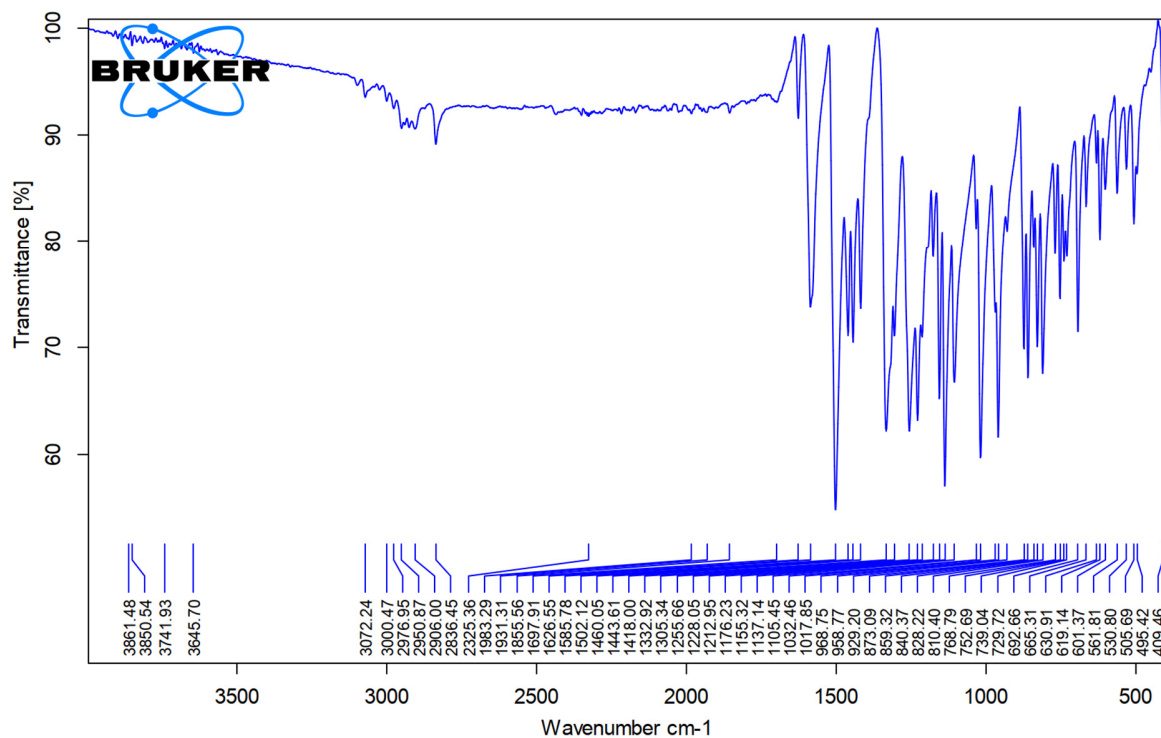

Figure S15. IR spectrum of compound **1d**.

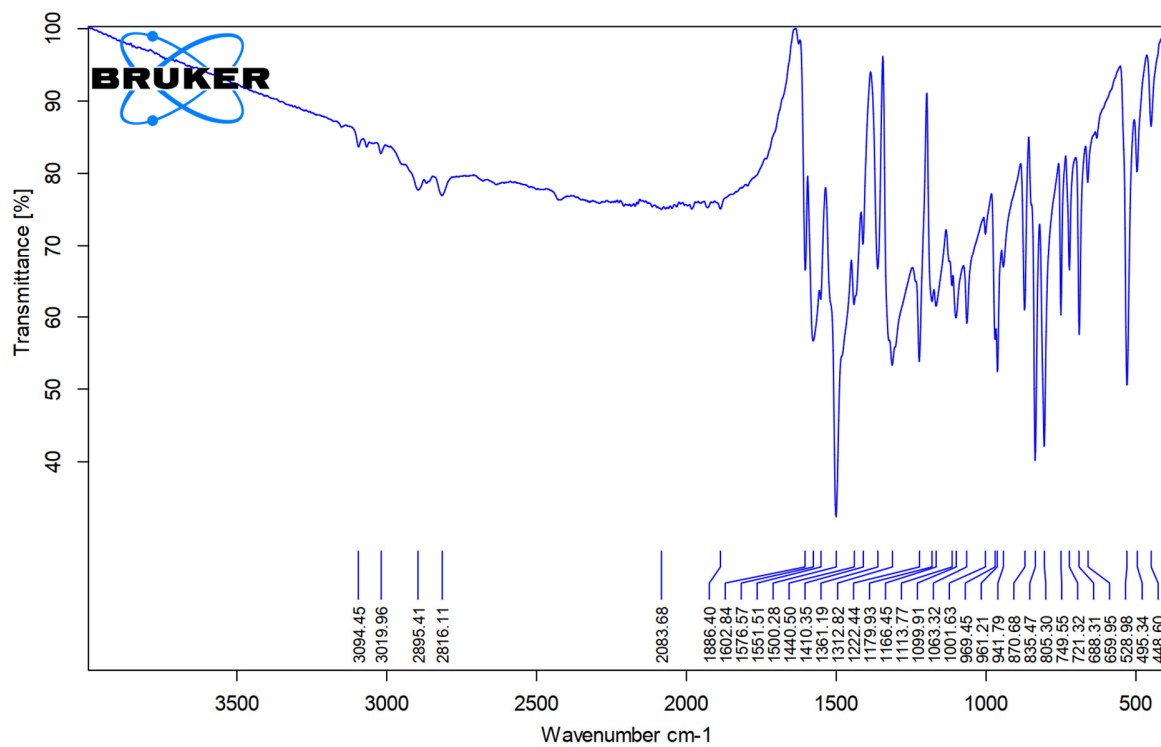

Figure S16. IR spectrum of compound **1e**.

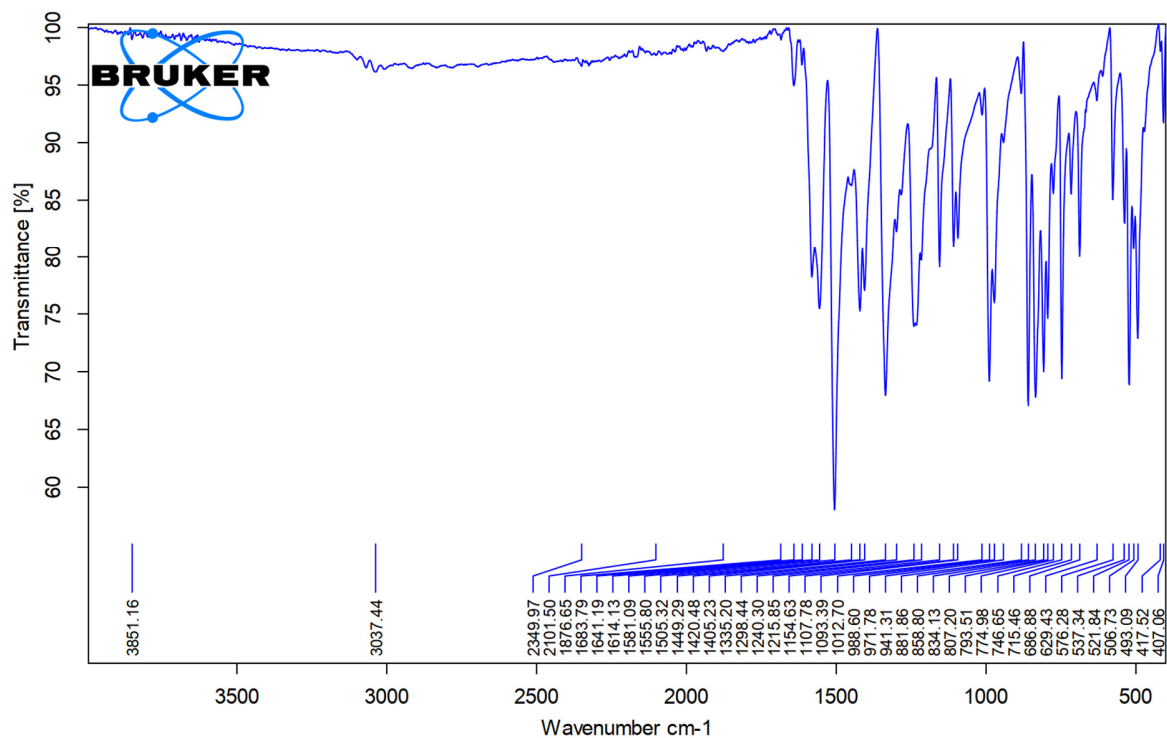

Figure S17. IR spectrum of compound 2a.

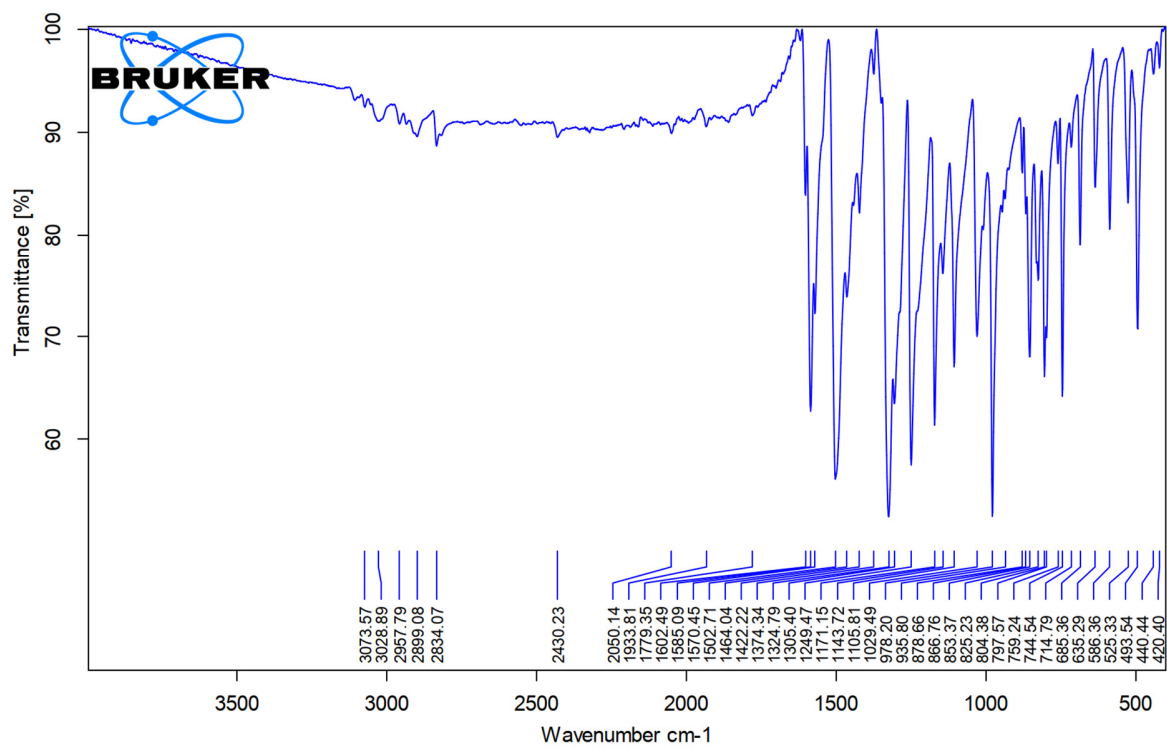

Figure S18. IR spectrum of compound 2b.

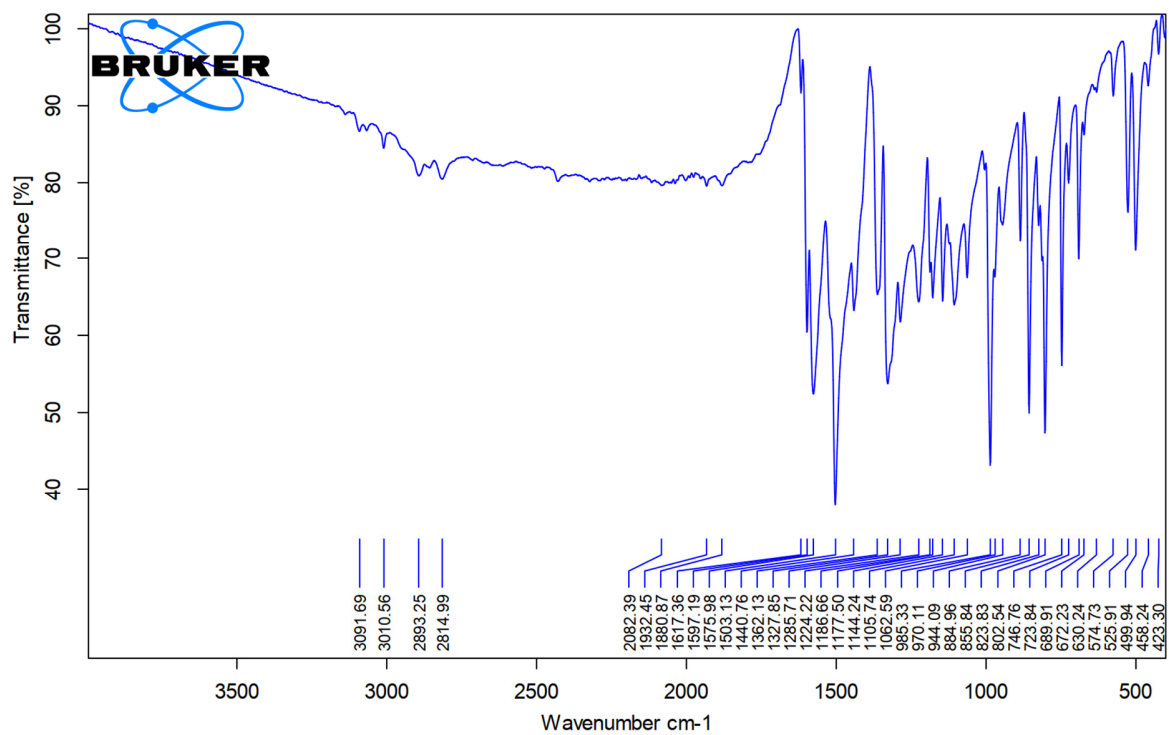

Figure S19. IR spectrum of compound 2c.

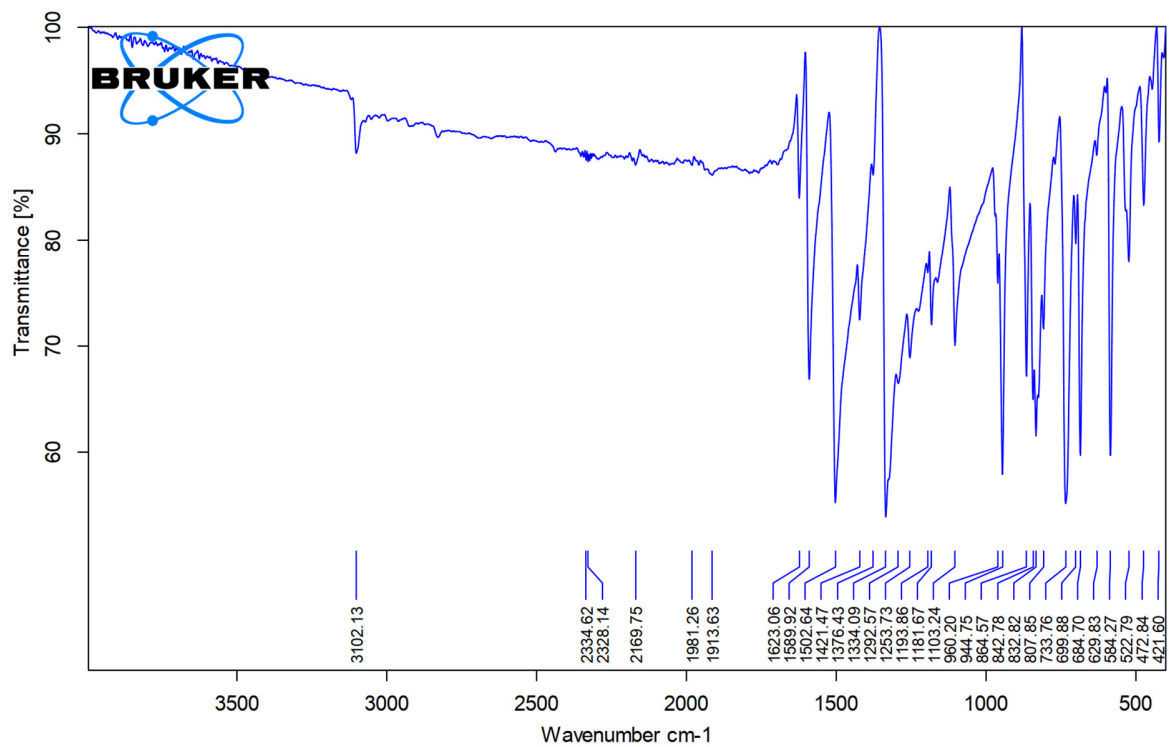

Figure S20. IR spectrum of compound 3a.

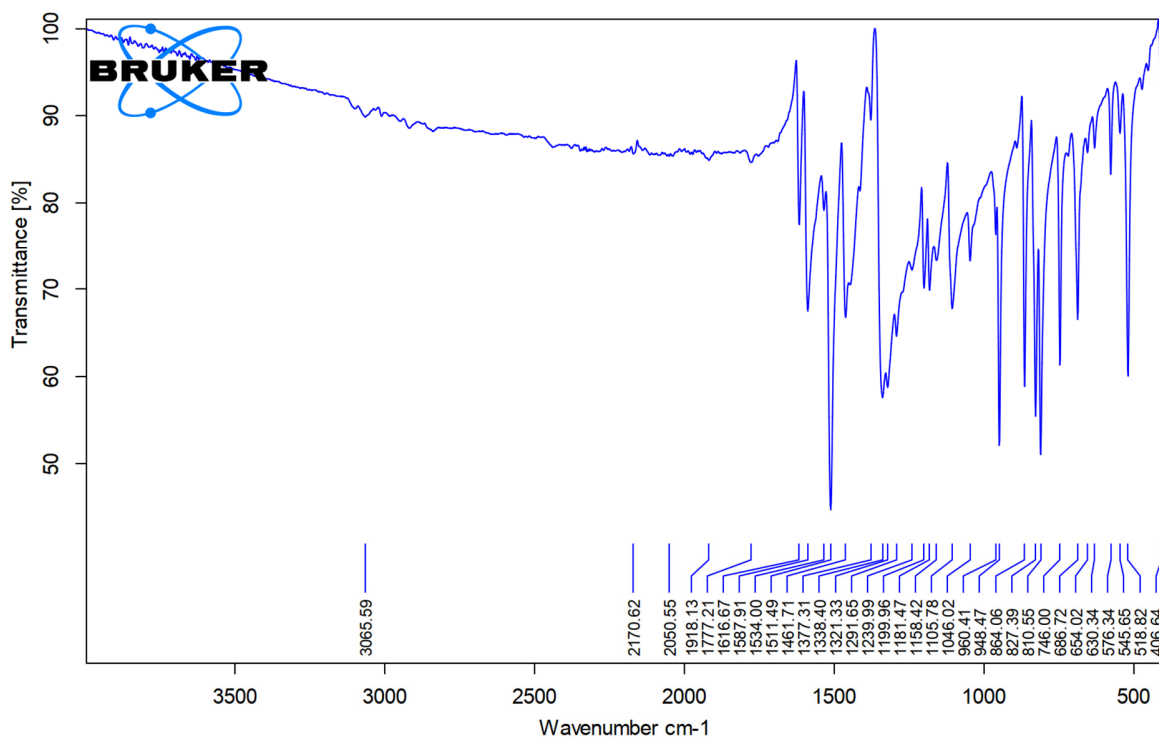

Figure S21. IR spectrum of compound **3b**.

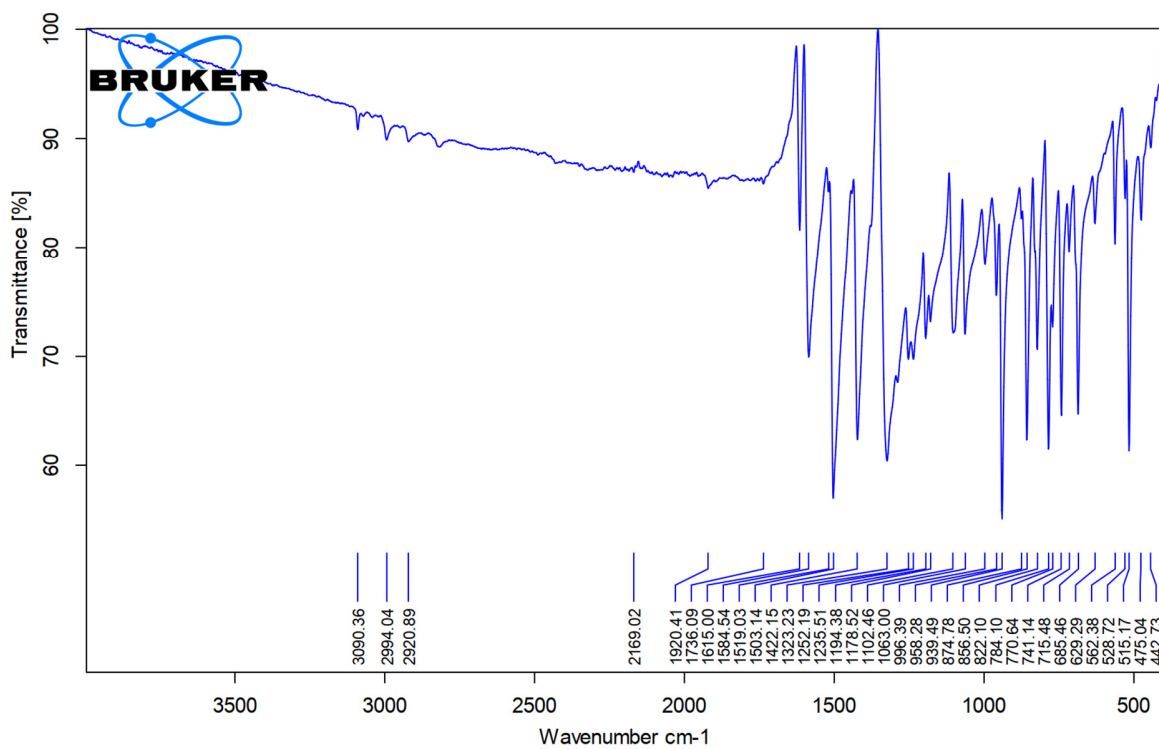

Figure S22. IR spectrum of compound **3c**.
